# Supplementary material for: SWAP1-SFPS-RRC1 splicing factor complex modulates pre-mRNA splicing to promote photomorphogenesis in Arabidopsis
Source: PubMed Central journal article supplement — Proc Natl Acad Sci U S A. 2022 Oct 25;119(44):e2214565119. doi: 10.1073/pnas.2214565119 (PMC9636961; doi:10.1073/pnas.2214565119), 2022-10-25
Supplement: pnas.2214565119.sapp.pdf [file pnas.2214565119.sapp.pdf]

## **Supporting Information for**

SWAP1-SFPS-RRC1 splicing factor complex modulates pre-mRNA splicing to promote photomorphogenesis in Arabidopsis

Praveen Kumar Kathare, Ruijiao Xin, Abirama Sundari Ganesan, Viviana M. June, Anireddy S. N. Reddy and Enamul Huq

\***Corresponding author:** Enamul Huq, E-mail: [huq@austin.utexas.edu](mailto:huq@austin.utexas.edu).

### **This PDF file includes:**

Supporting text

Figures S1 to S17

Tables S1 to S2

SI References

### **Other supporting materials for this manuscript include the following:**

Datasets S1 to S2

## SI Materials and Methods

### Vector construction and preparation of transgenic plants

To prepare *SWAP1*<sub>pro</sub>:*SWAP1-GFP*, a genomic DNA fragment containing ~1.6kb promoter region and ~2.7kb gene body was amplified using primers listed in Table S2 and directionally cloned into *pENTR/D-TOPO* vector following the standard protocol (Life Technologies). *pENTR-SWAP1*<sub>pro</sub>:*SWAP1* vector was recombined into *pGWB4* binary vector. To prepare *35Spro:SWAP1-4XFLAG*, full-length *SWAP1* open reading frame (ORF) was amplified using primers listed in Table S2 and cloned into *NheI/XmaI* restriction sites of *pEZS-NL*. *4XFLAG* DNA fragment was inserted in *SmaI/XbaI* site of *pEZS-NL-SWAP1*. *SWAP1-4XFLAG* was amplified using the primers listed in Table S2 and cloned into *SacI/BamHI* sites of *pCHF1* binary vector. To prepare *35Spro:SWAP1-mCherry*, full-length ORF was amplified using primers listed in Table S2 and cloned into *BamHI/XbaI* restriction site of the binary vector. All the binary vectors were transformed to *GV3101 Agrobacterium* and then into plants using the floral dip method (1).

To prepare *pVP13-SWAP1* bacterial expression construct, the full-length *SWAP1* ORF without the stop codon was amplified using primers listed in Table S2 and directionally cloned into *pENTR/D-TOPO* vector following standard protocol. *pENTR-SWAP1* vector was recombined into *pVP13* destination vector. The recombined vector was transformed to *BL21 (DE3)* strain of *E. coli*.

To construct *pYES2-SWAP1-GFP*, the full-length *SWAP1* CDS was amplified using primers listed in Table S2 and cloned into *pEZS-NL* vector. *SWAP1-GFP* was digested from *pEZS-NL* and cloned into *pYES2* vector (Life Technologies). *pYES2-SWAP1-GFP* construct was transformed into *RKY1293 Saccharomyces cerevisiae* yeast cells. To prepare *pGAD424-SWAP1* and *pGBT9-SWAP1* yeast 2-hybrid vectors, full-length *SWAP1* ORF was amplified using primers listed in Table S2 and cloned into *EcoRI/BamHI* restriction site. These constructs along with their combinations were transformed into yeast strain *AHI09*.

### Bacterial and yeast protein induction and purification

To induce the expression of proteins in bacterial culture, ~3ml of well-grown culture at 37°C was transferred to a 500mL flask containing 200mL of LB media and appropriate antibiotics. Flasks were transferred to 37°C rotary shaker for bacterial growth. When the culture reached an

OD of ~0.5, isopropyl  $\beta$ -D-thiogalactoside (final concentration 0.1mM) was added and incubated in a rotary shaker for 16 hrs at 18<sup>0</sup>C. After the incubation, bacteria were first pelleted and then resuspended in protein extraction buffer (100mM Tris-Cl, pH 8.0, 1mM EDTA, pH 8.0, 150mM NaCl, 1X protease inhibitor and 1mM PMSF). The bacterial suspension was sonicated, cell debris was pelleted, and the supernatant was used to purify tagged protein according to standard commercial protocols.

To induce the expression of proteins in yeast culture standard commercial protocol (Thermo Fischer Scientific Inc) was followed, albeit with a small modification. Phycocyanobilin (Frontier Scientific; Cat # P14137) was included in the media during the protein induction. Native protein extraction buffer (2) was supplemented with 1X protease inhibitor and 1mM PMSF. Crude protein extract was stored at -80<sup>0</sup>C until the assay was performed.

### ***In Vitro* pull-down and *In Vivo* Co-IP assays**

To perform *in vitro* pull-down assays, GST and MBP tagged proteins were expressed in the bacterial system and purified following standard commercial protocols. An equal quantity of GST-tagged protein was added to the amylose resin-bound MBP or MBP-tagged protein. To investigate the *in vitro* interaction between MBP-SWAP1 and phyB-GFP, an equal quantity of crude extract of phyB-GFP was added to the tubes containing amylose resin-bound MBP or MBP-SWAP1. Dark treatment (phyB-Pr) tubes were constantly kept in the dark, while the red light treatment (phyB-Pfr) tubes were irradiated with the red light (7 $\mu$ mol m<sup>-2</sup> s<sup>-1</sup>). Sample tubes were incubated in a rotary mixer at 4<sup>0</sup>C for 3 hrs. After the incubation, beads were pelleted and washed at least 5 times. Following the final wash, beads were immersed in 1X SDS loading buffer, boiled for ~5 minutes, and separated on 6-8% SDS gel. GST and GFP tagged proteins were detected using anti-GST (GE Health care Inc; Cat #RPN 1236) and anti-GFP (Abcam inc: Cat #ab290) antibodies, respectively.

To perform the *in vivo* co-IP assays, 4-day-old dark-grown seedlings were either kept in the dark or irradiated with the constant red light (7 $\mu$ mol m<sup>-2</sup> s<sup>-1</sup>) for 6 hrs. Sample tissues were frozen and ground thoroughly in native extraction buffer containing appropriate quantities of protease and proteasome inhibitors. Approximately ~1 $\mu$ g of appropriate antibody was added to the protein extract and incubated in a rotary mixer at 4<sup>0</sup>C for 3 hrs to immunoprecipitate one of the two tagged-proteins. Following the final wash, beads were immersed in 1X SDS loading buffer, boiled at 65<sup>0</sup>C

for ~5 minutes, and separated on 6-8% SDS gel. Interaction between bait and the prey protein was detected using appropriate combinations of primary and secondary antibodies.

### **Yeast two-hybrid assays**

Different combinations of AD and BD vectors were transformed into yeast strains *AH109/Y187* and multiple positive double transformants were selected on yeast drop-out medium (SD-Ade-Leu-Trp/SD-Leu-Trp). To determine whether the two proteins are interacting within the yeast system, liquid  $\beta$ -galactosidase assay was performed following standard commercial protocol (Clontech Lab; Matchmaker Two-Hybrid System).

### **RNA-seq data analyses**

Wild-type, *swap1-1* single, three double (*swap1-1sfps-2*, *swap1-1rrc1-3*, *sfps-2rrc1-3*) and the triple (*swap1-1sfps-2rrc1-3*) mutant seedlings were grown under complete darkness for 4 days and then one batch of seedlings in triplicate biological repeats was exposed to continuous red light for 3 hrs (R:  $7\mu\text{mol m}^{-2} \text{s}^{-1}$ ), while the other batch was kept under darkness (D). Following treatment, seedlings were frozen immediately and ground to fine powder. Total RNA was isolated using a commercially available RNA isolation kit following manufacturer's instructions (Sigma inc: Cat #STRN250-1KT). Total RNA with RIN (RNA Integrity Number) > 6.5 and 28S/18S > 1.0 was used for directional library preparation followed by sequencing using NovoSeq PE150 (Novogene, Inc). The sequencing yield is ~200 million reads per sample. For each library, > 90% of the reads were mapped to the unique loci of Arabidopsis TAIR10 genome with the STAR pipeline (3). Differential gene expression was analyzed using DEseq2 (4). Genes with FDR values lower than 0.05 and absolute log two-fold change greater than 0.58 (1.5-fold) were considered as differentially expressed.

AS was analyzed through ASpli (Version 2.4.0) as part of the Bioconductor R package (5), which quantifies the pre-mRNA splicing events through calculating PSI and PIR matrix. In the new version of ASpli, the AS events with an absolute FDR < 5% and Delta PSI\_PIR > 20% were deemed differentially spliced. To generate heatmaps and scatterplots, the Z-scores of PSI\_PIR values and square roots of PSI\_PIR values were calculated as described (2). GO categories belonging to biological processes, molecular functions, and cellular components were analyzed

using GeneCodis4. GO terms with P value < 0.05 and FDR <0.05 were considered as significantly enriched.

### **RNA extraction and RT-qPCR analysis**

To perform RT-qPCR analysis, seedlings were frozen immediately following different treatment conditions. Total RNA was isolated using a commercially available RNA isolation kit following manufacturer's instructions (Sigma Inc: Cat #STRN250-1KT). Contaminating DNA was removed using RNase-free DNase treatment and 1µg of total RNA was used to synthesize cDNA using reverse transcriptase enzyme following manufacturer's instructions (Invitrogen: Cat # 28025013). Gene-specific primer sequences used in this study are listed in Table S2. House-keeping gene *PP2A* was used as an internal control throughout the analyses and the relative expression level was calculated using the comparative  $C_T$  method.

### **RNA Immunoprecipitation assays**

Ten-day-old *SWAPI<sub>pro</sub>:SWAPI-GFP/swap1-1* transgenic seedlings grown under 12 hrs light/12 hrs dark conditions were harvested at ZT 12 and immediately cross-linked by vacuum infiltration with 0.5% formaldehyde for 10 mins and then quenched by vacuum infiltration with 0.125 M glycine for 5 mins. Samples were washed with large amounts of autoclaved de-ionized water and dried on filter paper. Samples were immediately frozen and then RNA-IP was conducted following the protocol described previously (2, 6). Primers used in this analysis are listed in Table S2.

**A**

| Accession         | Spectrum Number (Control) | Spectrum Number (SFPS) | Unique Peptides | Protein Coverage |
|-------------------|---------------------------|------------------------|-----------------|------------------|
| At1g30480 (SFPS)  | 0                         | 872                    | 25              | 0.3979           |
| At4g31200 (SWAP1) | 0                         | 31                     | 12              | 0.2446           |

**B**

```

1  MDRRQHDYAA  SGLPYAQQQ  QQQGNFQQQ  QQPQFGFHPQ  HPQYSPMNA
51  SGFIPPHPSM  QQFPYQHPMH  QQQQPQHLPH  PPHPQMFGQQ  QPQAFPLPHLP
101 PHHLPPFPFG  PYDSAPPPP  PADPELQKRI  DKLVEYSVKN  GPEFEAMMRD
151 RQKDNPDYAF  LFGGEGHGY  RYKHFLSMHP  PGGPFDPPFP  SSSMPMIHHP
201 PNPMMSPSMN  NVPGALAVPP  IRQPPFPFPH  DHHQLQQHLP  QPHPFAPHAR
251 PDFDQSTHAF  RGLSGPLPAD  VAMELNGVLG  NLNGTKESIK  SAKIWFMQRS
301 FFAPALAEAL  RDRVFAMDDS  DRQMHIVYLA  NDILFDSLQR  RTNLHEFDNE
351 ALAFRPILGS  MLGRIYHFPO  NKEENQSRLE  KILQFWASKE  VFDQDTISL
401 EKEMKSGPPA  NTFSHSPIIA  AHALQRPGML  QQPPNSNVSS  TMNLEHLTNP
451 VATQQFIPNV  MPPGAFPGSI  PLNASVPPPT  QPPAGEKPPP  YPLFPPGLIP
501 GMVRKMQIGS  GVPYSPLSPL  DIPTVIPPSD  TPQSEVLERV  SKFFKEIGEV
551 NPSEGPMGSE  SQDDYDNYER  DSPQRKGGAC  IPPPPNLQVD  PETGTYADGS
601 TDKKSGSGRL  GLGATADPNE  PTQYDDVYTS  YRKHRSTNYH  TSMSARATTR

```

**C**

At4g31200 (SWAP1)

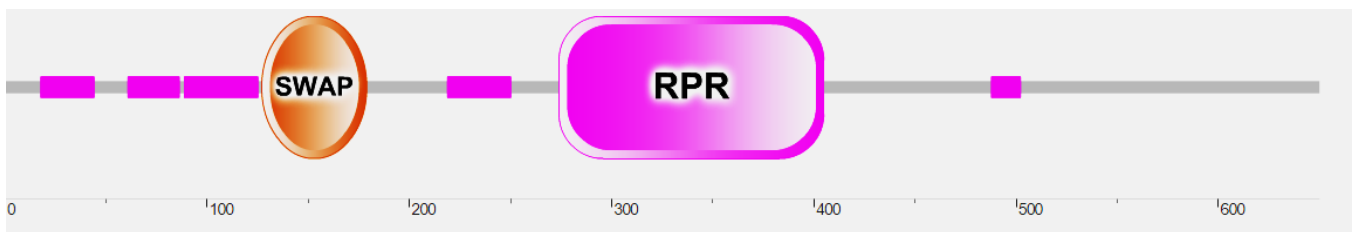

**Fig. S1: Identification of SWAP1 as SFPS interactor in IP-MS (Immunoprecipitation followed by mass spectrometry) assay.**

(A) SWAP1 co-immunoprecipitates with SFPS-GFP. Four-day-old dark-grown *SFPS<sub>pro</sub>:SFPS-GFP/sfps-2* seedlings were either kept in the dark or irradiated with red light ( $7\mu\text{mol m}^{-2} \text{s}^{-1}$ ) for 6 hrs. SFPS-GFP was immunoprecipitated using anti-GFP antibodies and interacting proteins were identified through MS-MS. (B) SWAP1 protein sequence showing peptides (colored) detected in MS-MS. (C) Predicted conserved domains of SWAP1 protein.

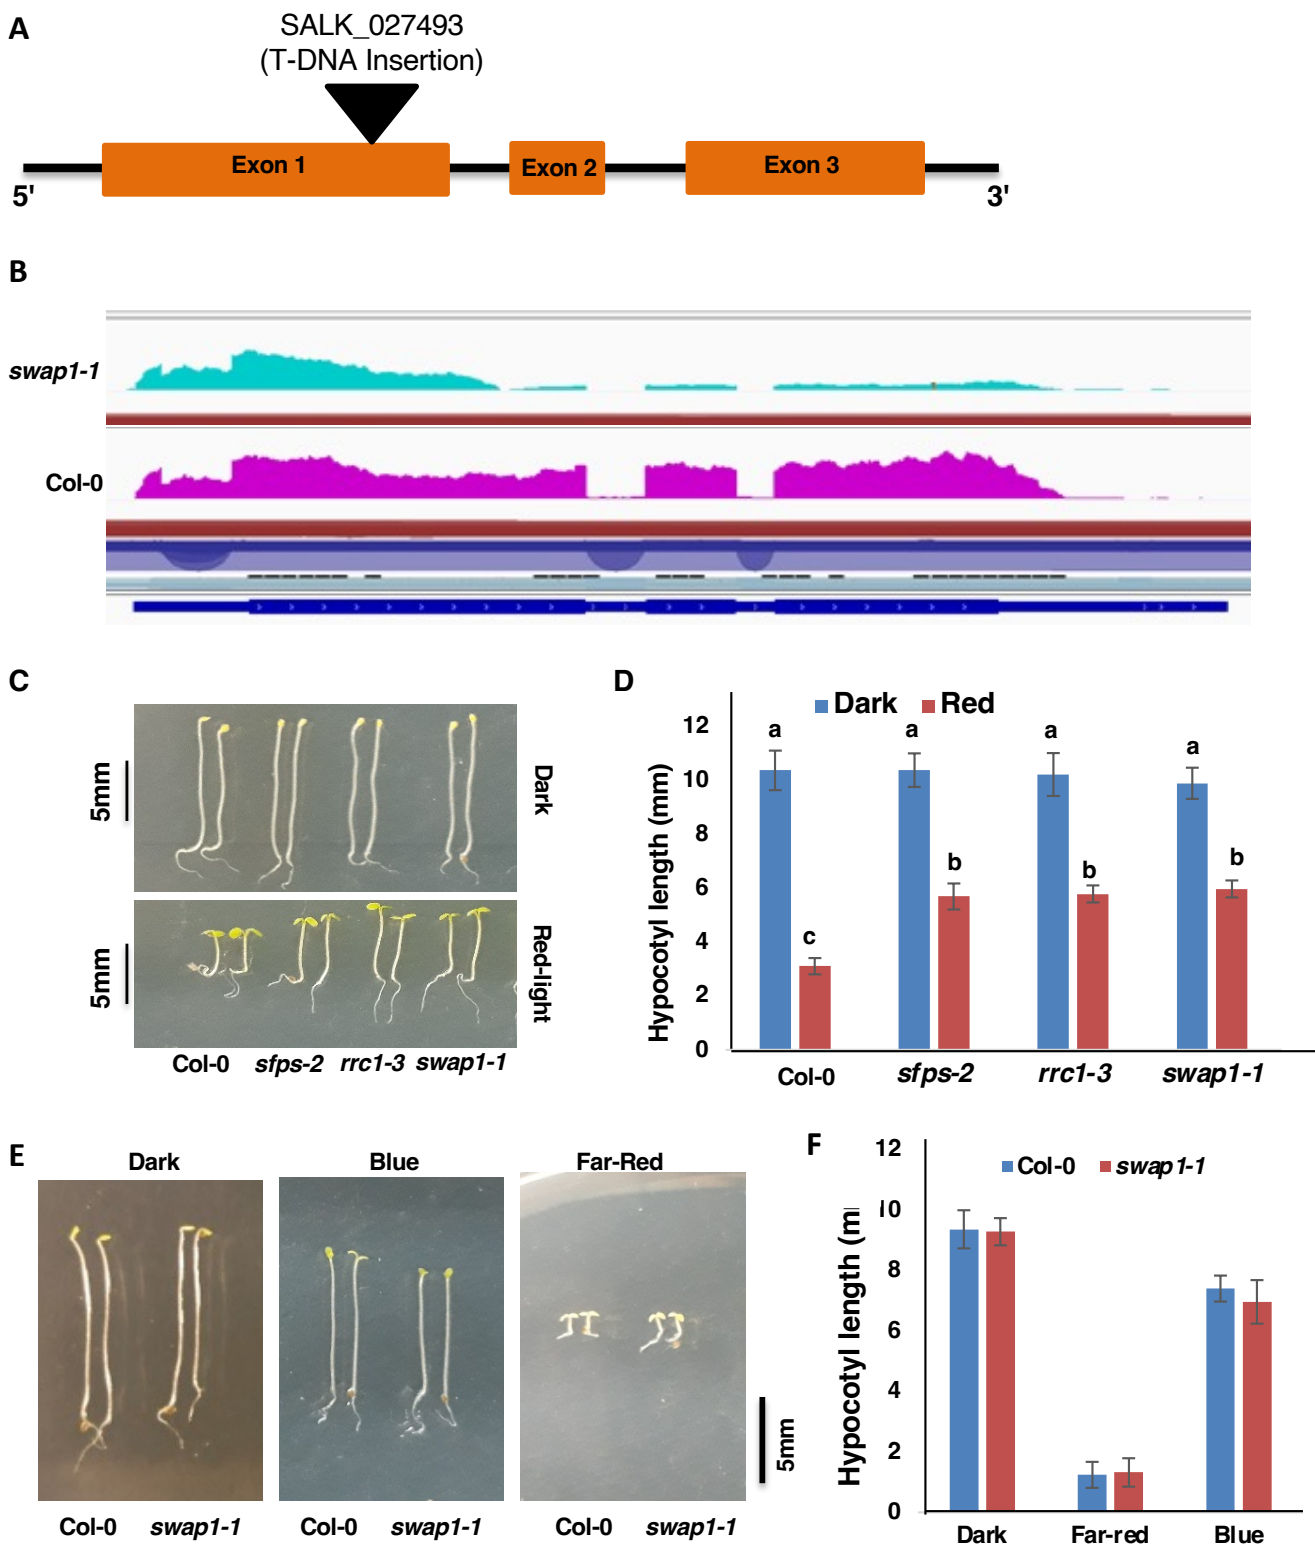

**Fig. S2: *swap1-1* mutant seedlings display wild-type sensitivity on blue and far-red light**

(A). Schematic diagram showing the gene structure of *SWAP1* and the T-DNA insertion site of *swap1-1* (SALK\_027493). Lines are not to the scale. (B) IGV visualization of *SWAP1* expression in Col-0 and *swap1-1* mutant. (C and D) Digital images of representative seedlings (C) and bar graph showing hypocotyl lengths (D) of different genotypes grown under either continuous dark or continuous red light ( $7\mu\text{molm}^{-2}\text{s}^{-1}$ ) for 4 days. Bars indicate mean length in mm and error bars indicate standard deviation. Statistical significance among different genotypes was determined using single factor ANOVA followed by Tukey's post hoc analysis and is indicated by different letters. (E) Digital images of representative seedlings of different genotypes grown under either continuous dark or continuous far-red-light or blue-light for 4 days. (F) Quantification of the hypocotyl length of 4-day-old seedlings grown under either continuous dark or continuous far-red light or blue light. Bars indicate mean length in mm and error bars indicate standard deviation. Statistical significance between Col-0 and *swap1-1* was determined by student's T-Test.

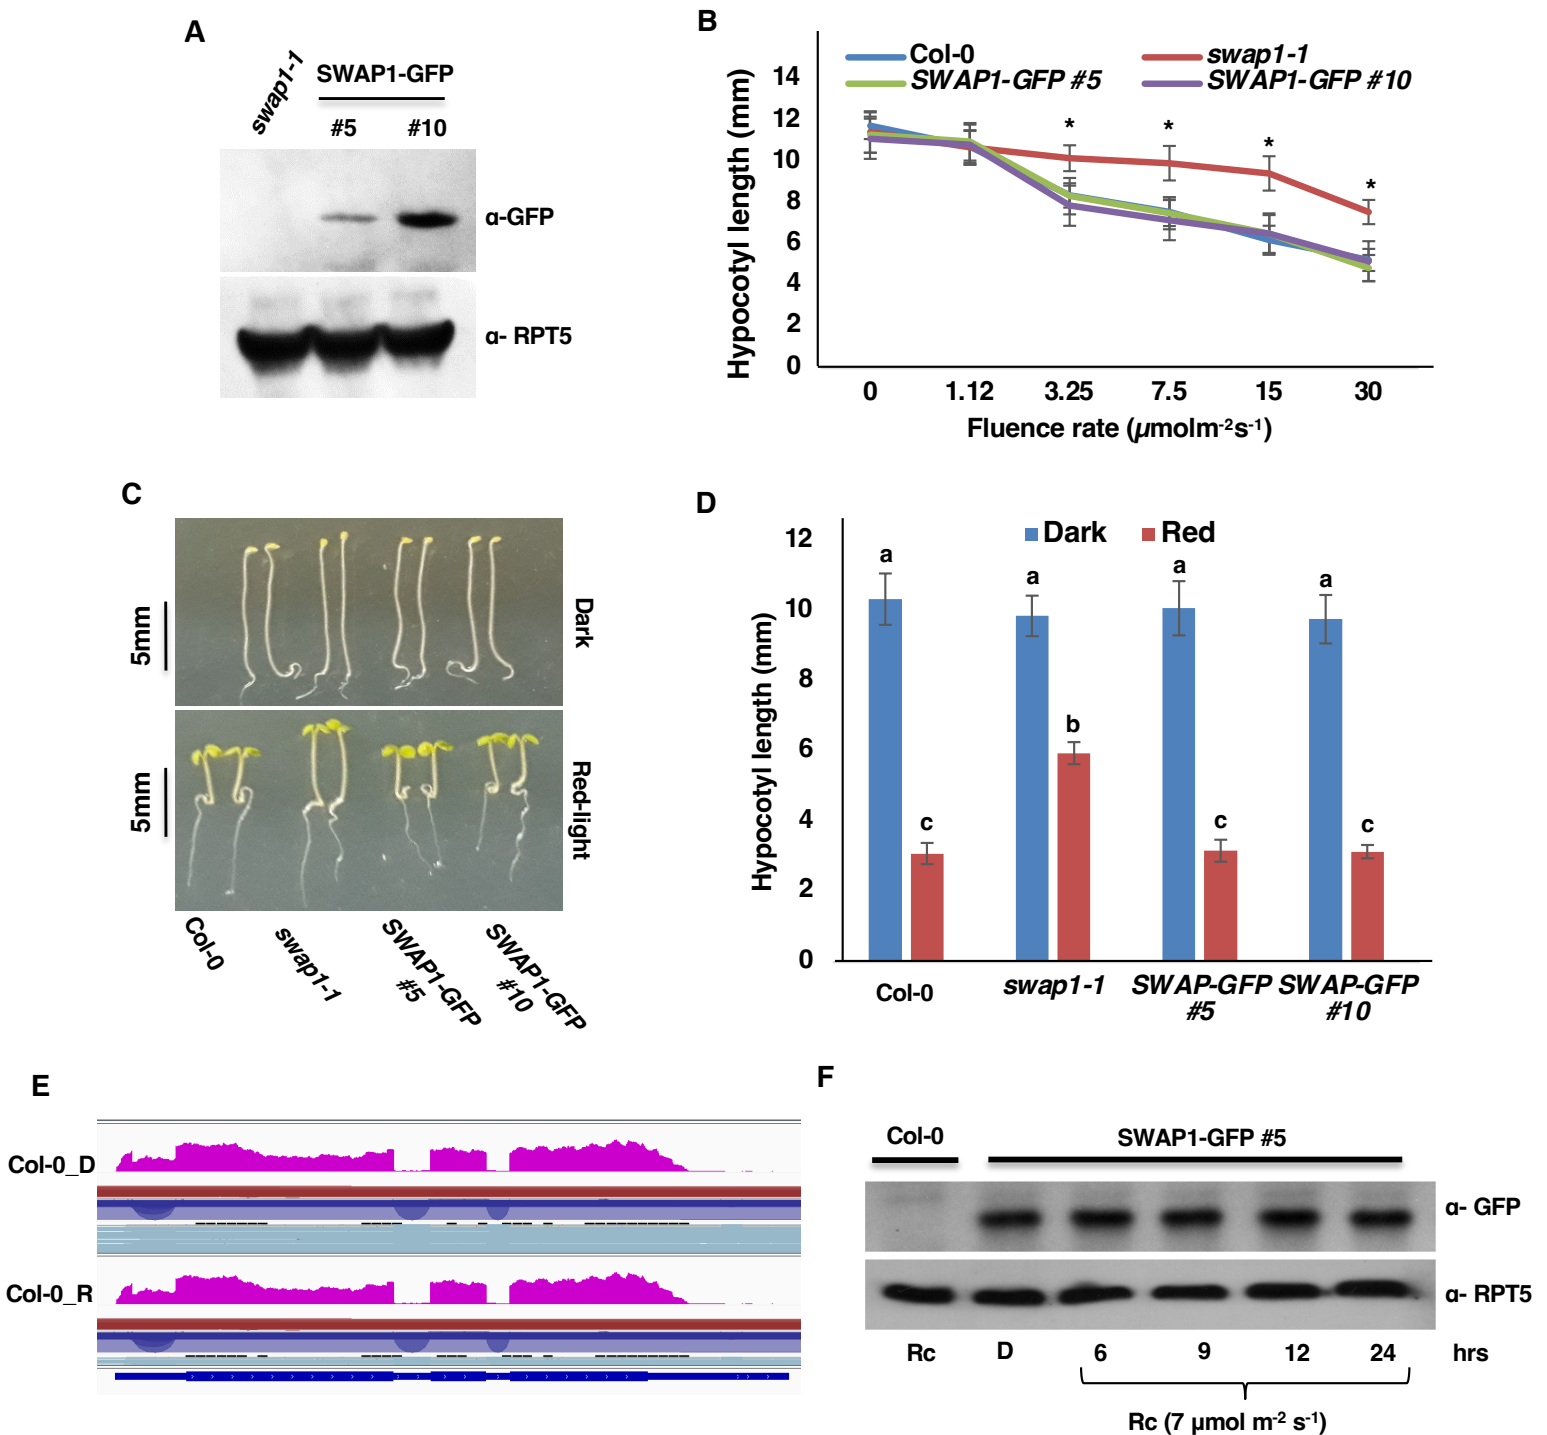

**Fig. S3: *SWAP1<sub>pro</sub>:SWAP1-GFP* complements the *swap1-1* mutant phenotype under red light**

(A) SWAP1-GFP protein quantification in two independent homozygous *SWAP1<sub>pro</sub>:SWAP1-GFP* transgenic seedlings. (B) Quantification of the hypocotyl length of 4-day-old seedlings of two independent transgenic lines expressing SWAP1-GFP under its own promoter along with *swap1-1* grown under either continuous dark or continuous red light of different fluence rate. Error bars indicate sem ( $n > 30$ ), and asterisks indicate significant difference compared to Col-0 ( $P < 0.05$ ) based on student's t-test. (C and D) Digital images of representative seedlings (C) and bar graph showing hypocotyl lengths (D) of different genotypes grown under either continuous dark or continuous red light ( $7 \mu\text{molm}^{-2}\text{s}^{-1}$ ) for 4 days. Bars indicate mean length in mm and error bars indicate standard deviation. Statistical significance among different genotypes was determined using single factor ANOVA followed by Tukey's post hoc analysis and is indicated by different letters. (E) IGV visualization of *SWAP1* expression in Col-0 under dark and red-light irradiated conditions. (F) SWAP1-GFP protein abundance in dark and red light treated seedlings. Total protein was extracted in denaturing buffer and protein was separated on 10% SDS-PAGE gel. Protein was transferred to a PVDF membrane and the presence of SWAP1-GFP was detected using  $\alpha$ -GFP antibody. RPT5 protein was used as an internal control.



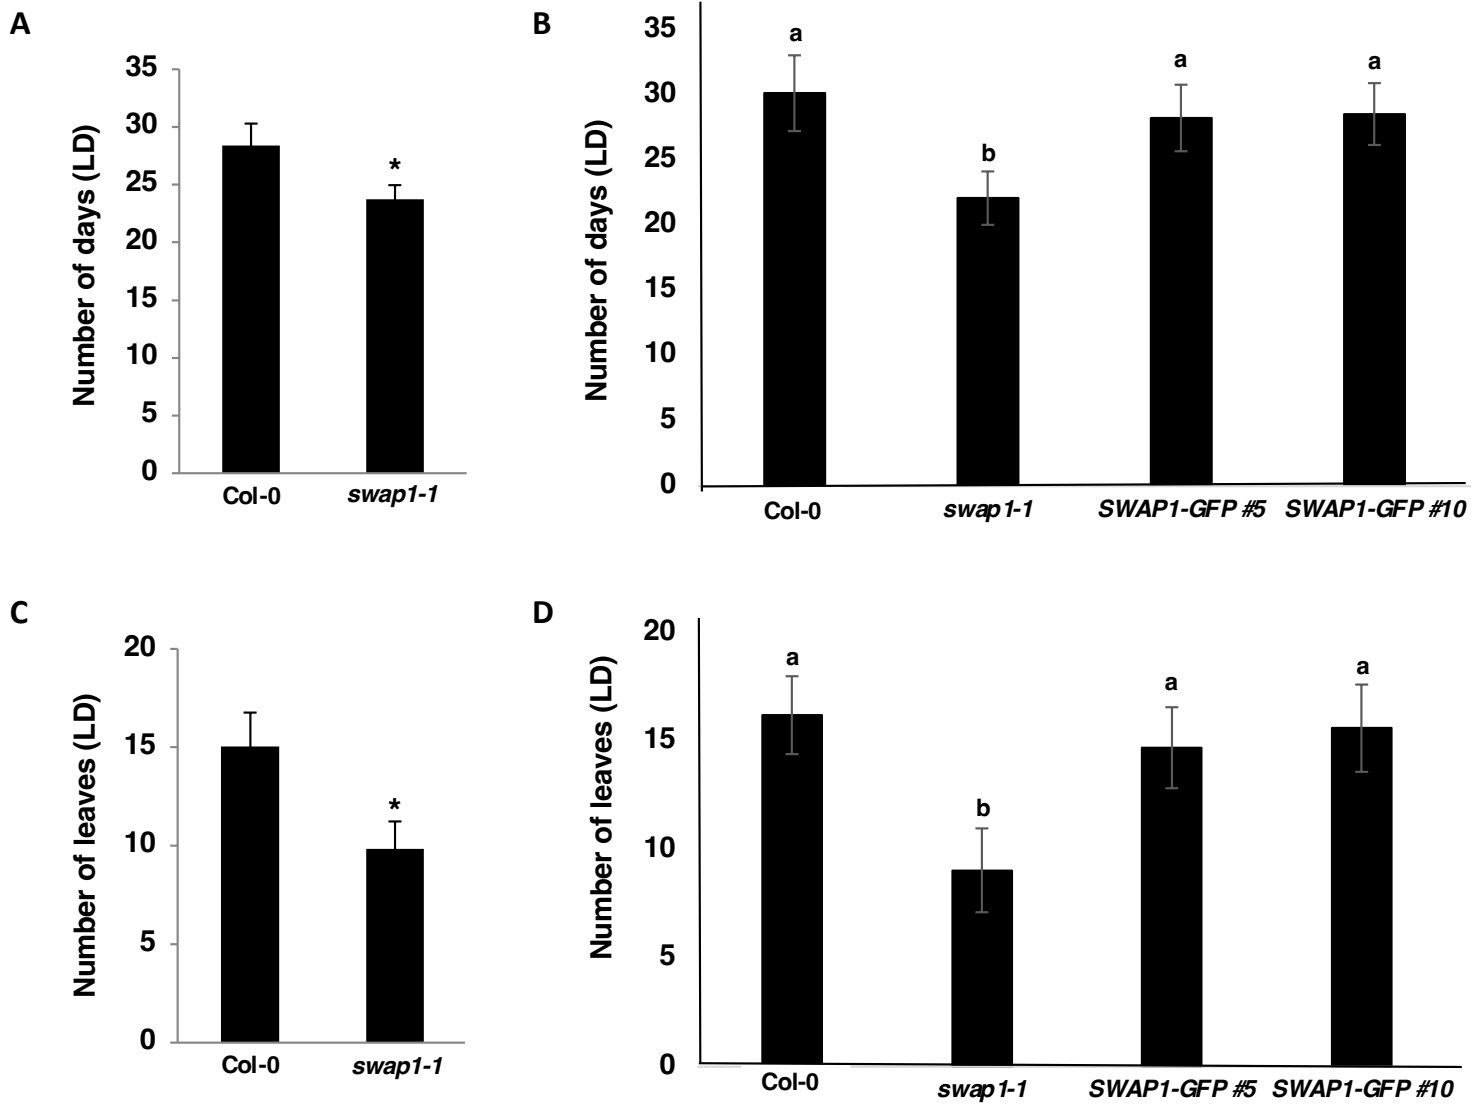

**Fig. S4: *swap1-1* mutant plants flower early under long-day conditions.**

(A) And (B) Number of days it takes plants show 1cm bolting under long-days (LD: 16hrs light/8hrs dark) condition. (C) and (D) Number of rosette leaves plants have when plants show 1cm bolting under LD condition. Each data point represents the mean average of at least 20 plants and the error bars show SD. Either Student's T-Test or one-way ANOVA followed by Tukey's post-hoc test was carried out to determine the statistical significance between or among samples, respectively.

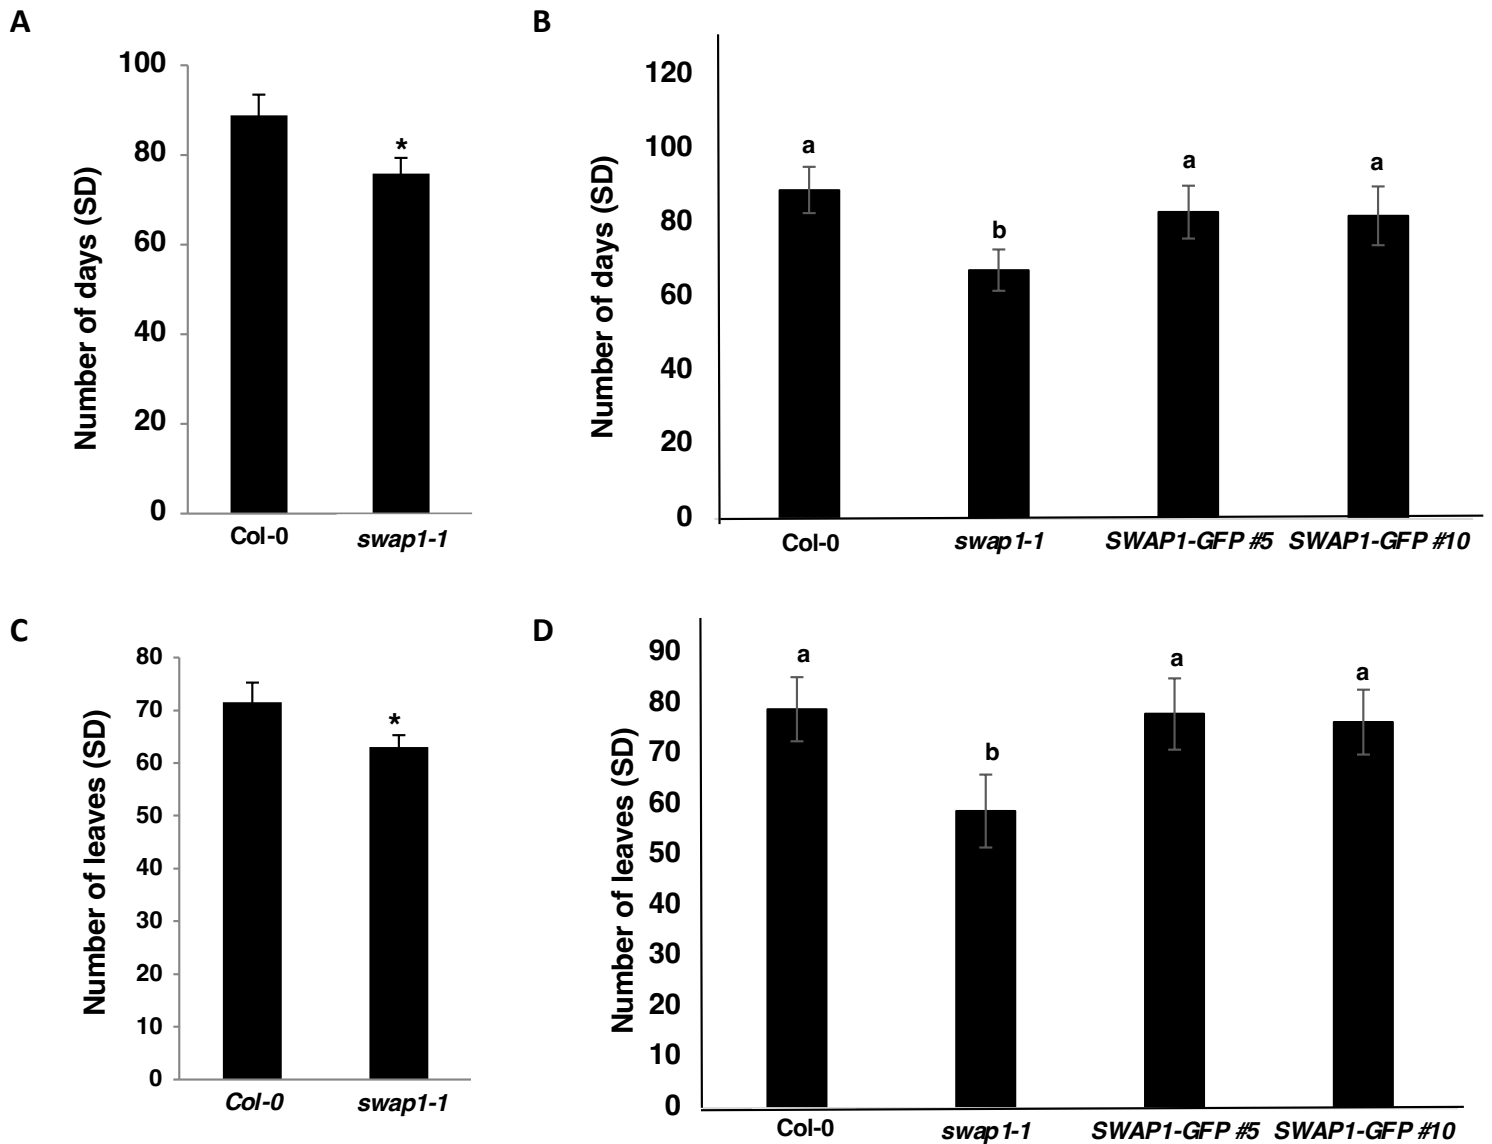

**Fig. S5: *swap1-1* mutant plants flower early under short-day conditions.**

(A) And (B) Number of days it takes plants show 1cm bolting under short-days (SD: 8hrs light/16hrs dark) condition. (C) and (D) Number of rosette leaves plants have when plants show 1cm bolting under SD condition. Each data point represents the mean average of at least 20 plants and the error bars show SD. Either Student's T-Test or one-way ANOVA followed by Tukey's post-hoc test was carried out to determine the statistical significance between or among samples, respectively.

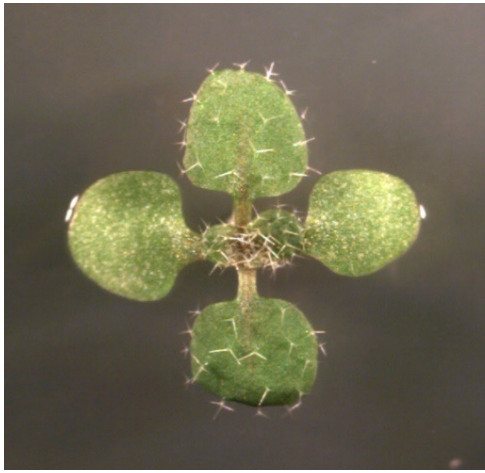

**Col-0**

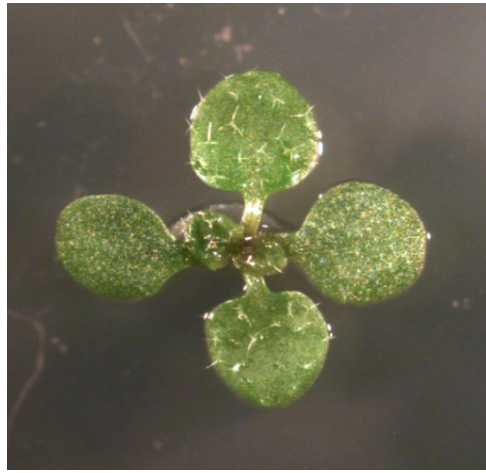

***sfps-2***

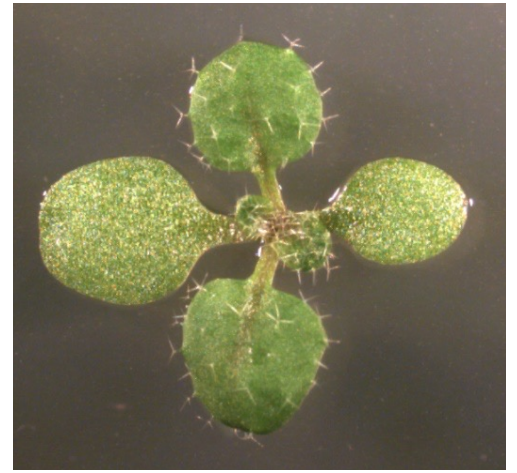

***rrc1-3***

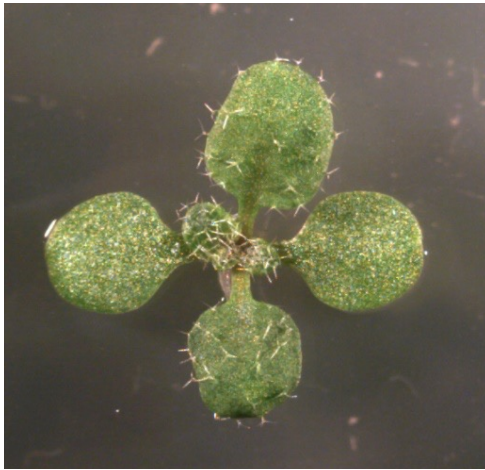

***swap1-1***

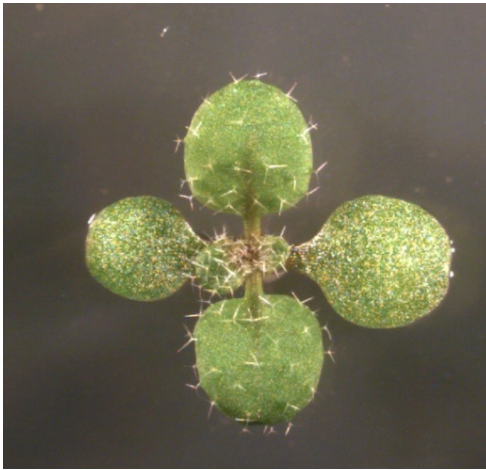

***sfps-2rrc1-3***

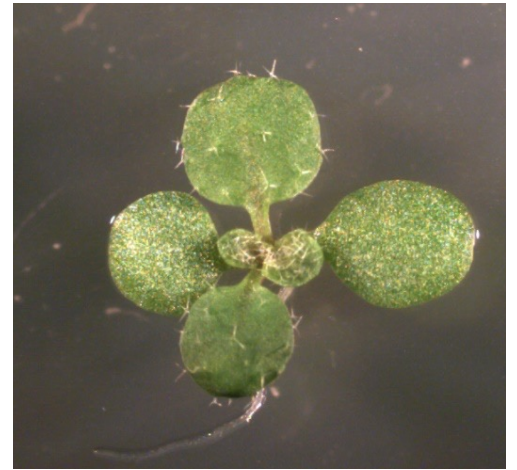

***swap1-1rrc1-3***

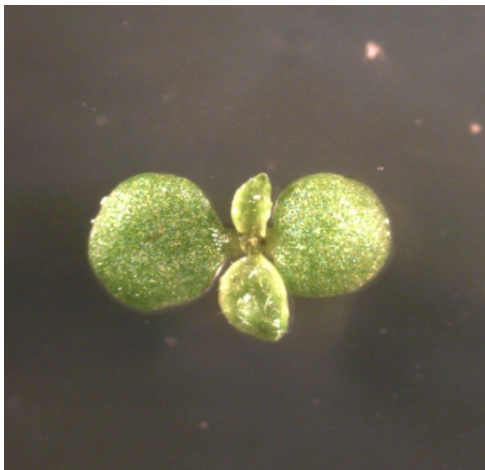

***swap1-1sfps-2***

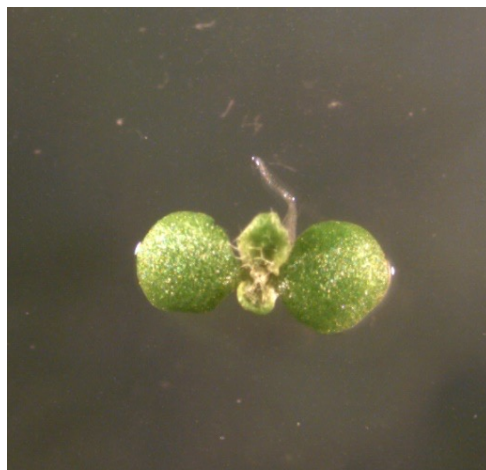

***swap1-1sfps-2rrc1-3***

5mm

**Figure S6: *swap1sfps-2* and *swap1sfps-2rrc1-3* display delayed onset of true-leaves at juvenile stage**

Digital photographs showing the details of cotyledons and true leaves. Fourteen-day old light-grown seedlings were used for imaging.

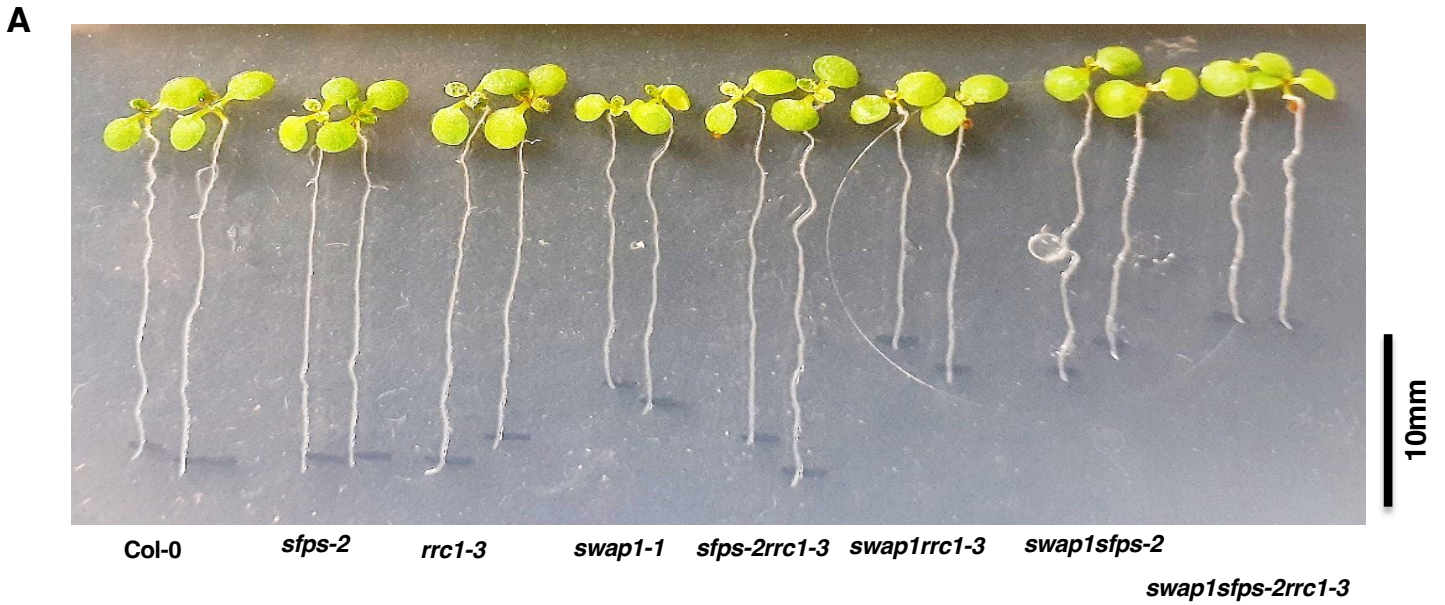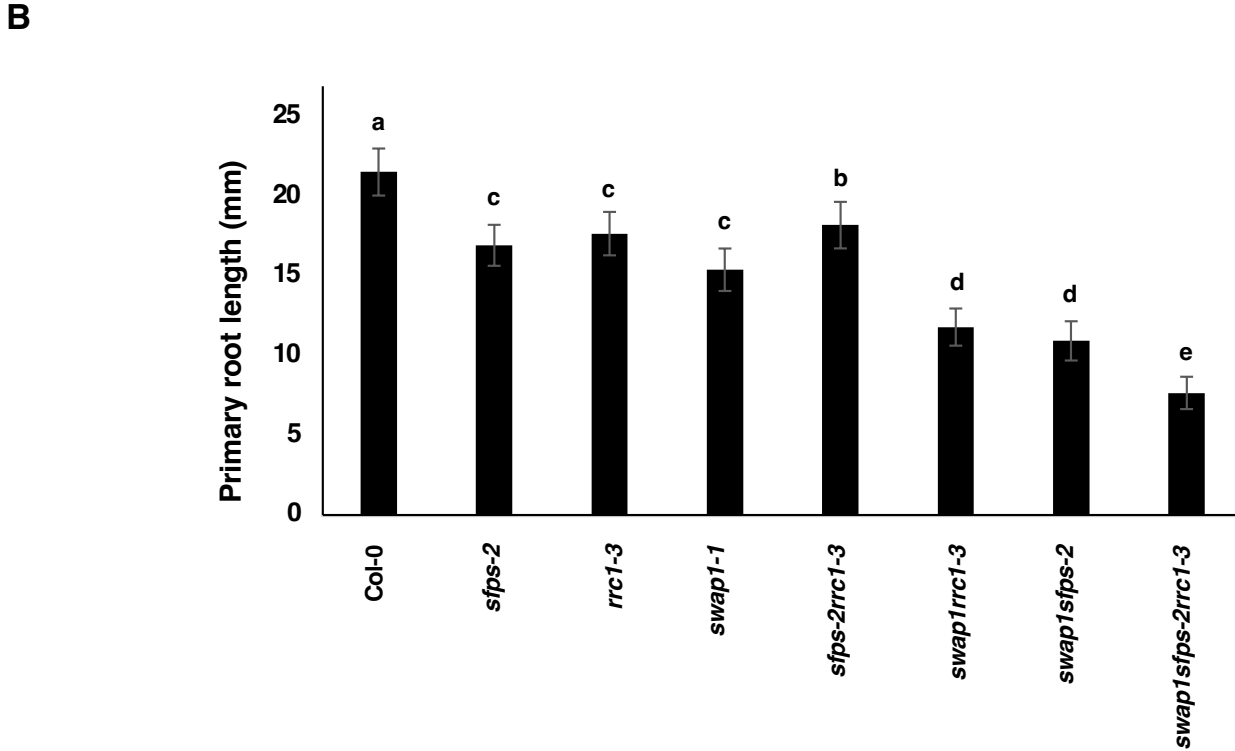

**Figure S7: Single and higher order mutants display shorter primary roots under continuous light**

(A) Digital photograph showing the representative image of length of primary root of 8-day old light-grown seedlings. (B) Quantification of primary root length. Each data point represents the mean of at least 20 seedlings and error bars represents SD. One-way ANOVA followed by Tukey's post-hoc test was carried out to determine the statistical significance among the samples.

**A**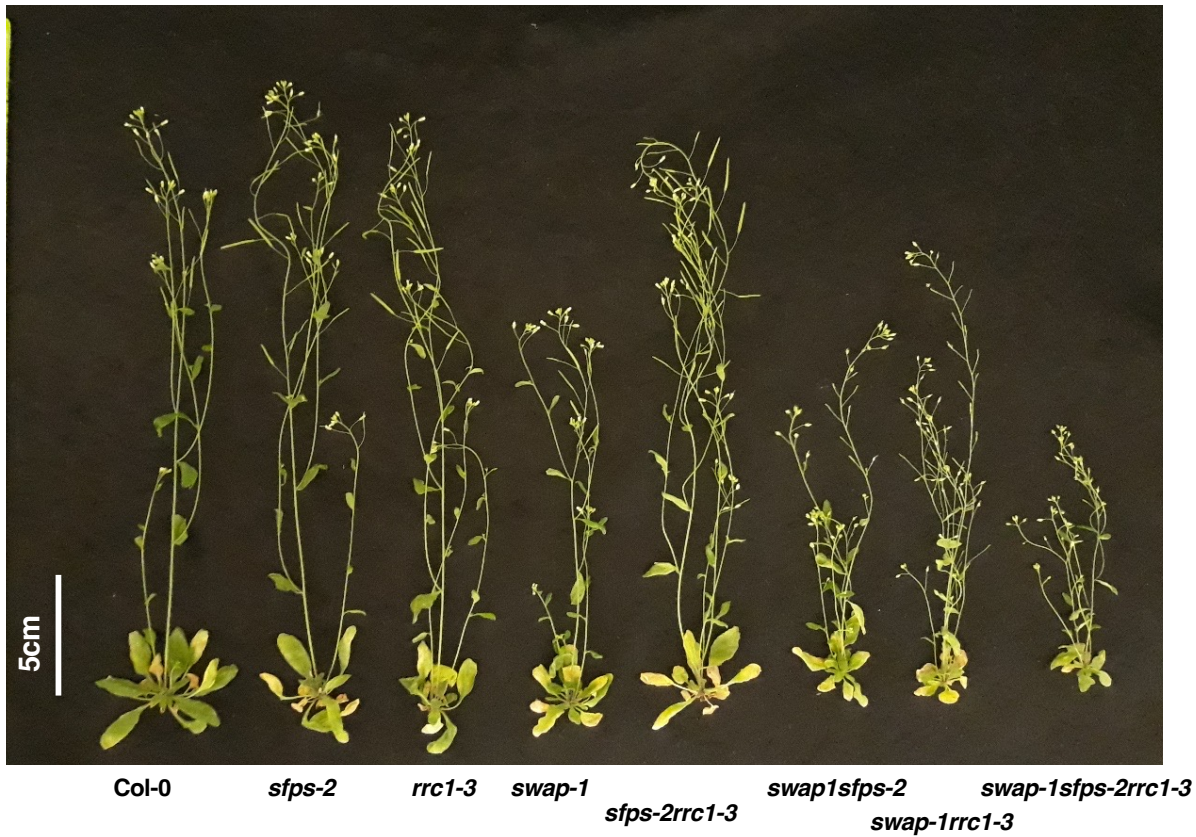**B**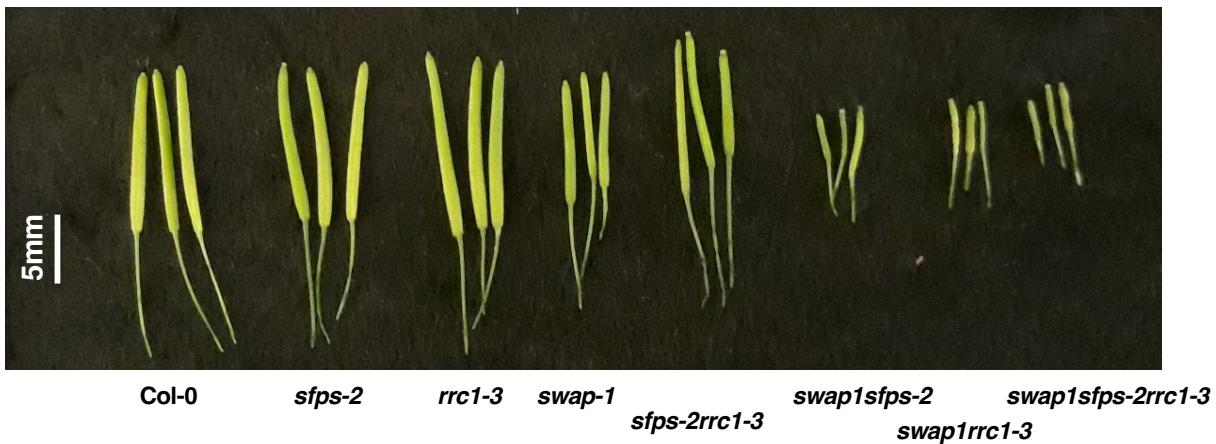

**Figure S8: *swap1* single, *swap1sfps*, *swap1rrc1* double and *swap1sfpsrrc1* triple display shorter inflorescence and siliques compared to wild type at adult stage.**

Digital photographs showing the inflorescence length of adult plants (A) and silique lengths (B). Seven-day old light-grown seedlings were transferred to the soil and then grown under continuous light for 5 weeks inside a growth chamber and then digital images were taken from representative plants and siliques.

**A**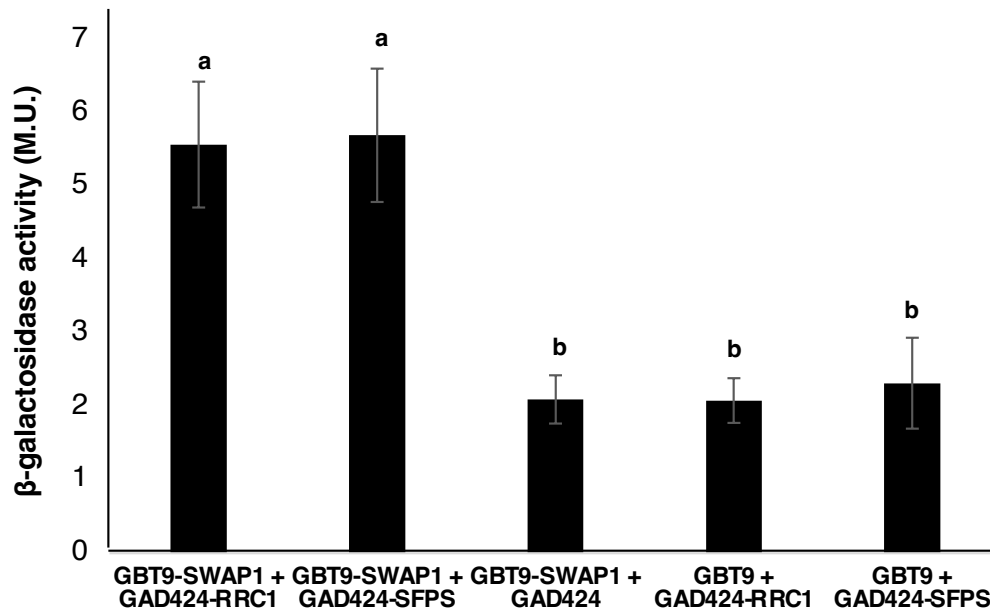**B**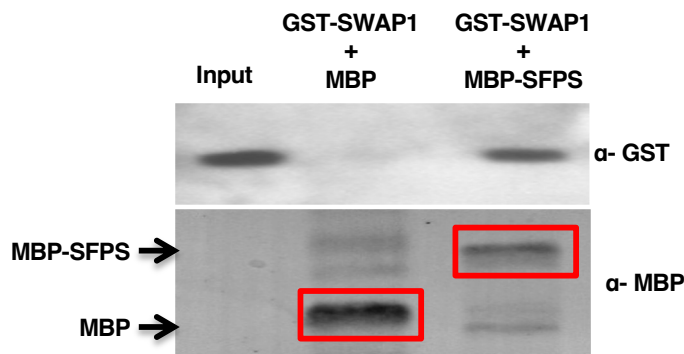**C**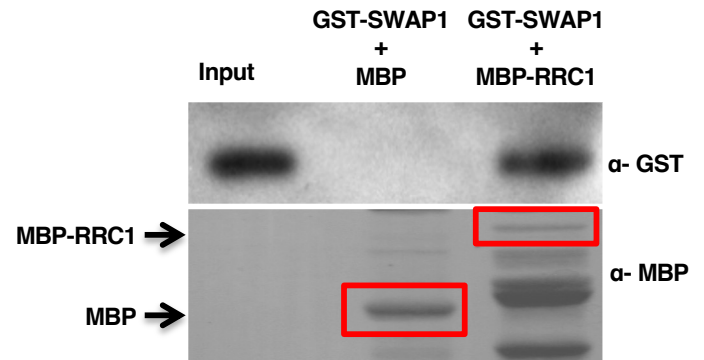**Fig. S9: SWAP1 interacts with SFPS and RRC1**

- (A) SWAP1 interacts with both SFPS and RRC1 in a yeast 2-hybrid system. Full-length SWAP1 CDS was inserted in pGBT9 vector, while full-length CDS of SFPS and RRC1 were inserted in pGAD424 vector. Liquid  $\beta$ -Galactosidase activity assay was carried out to quantify the strength of interaction between SWAP1 and SFPS/RRC1. Each data point reflects the average of three values and the error bars represents the SD. One-way ANOVA with Tukey's post-hoc test ( $P < 0.01$ ) was carried out to determine the statistical significance among the samples.
- (B) GST-SWAP1 interacts with MBP-SFPS and MBP-RRC1 (C) *in vitro*. Bacterially expressed and amylose resin-bound MBP, MBP-SFPS and MBP-RRC1 were used as bait proteins to pull-down GST-SWAP1 prey protein. The pull-down reaction was incubated for 60mins at 4<sup>o</sup>C on a rotating shaker. After the incubation, beads were washed at least 5 times. Proteins were separated on 10%SDS-PAGE gel, transferred to PVDF membrane and first immunoblotted with  $\alpha$ -GST, followed by  $\alpha$ -MBP.

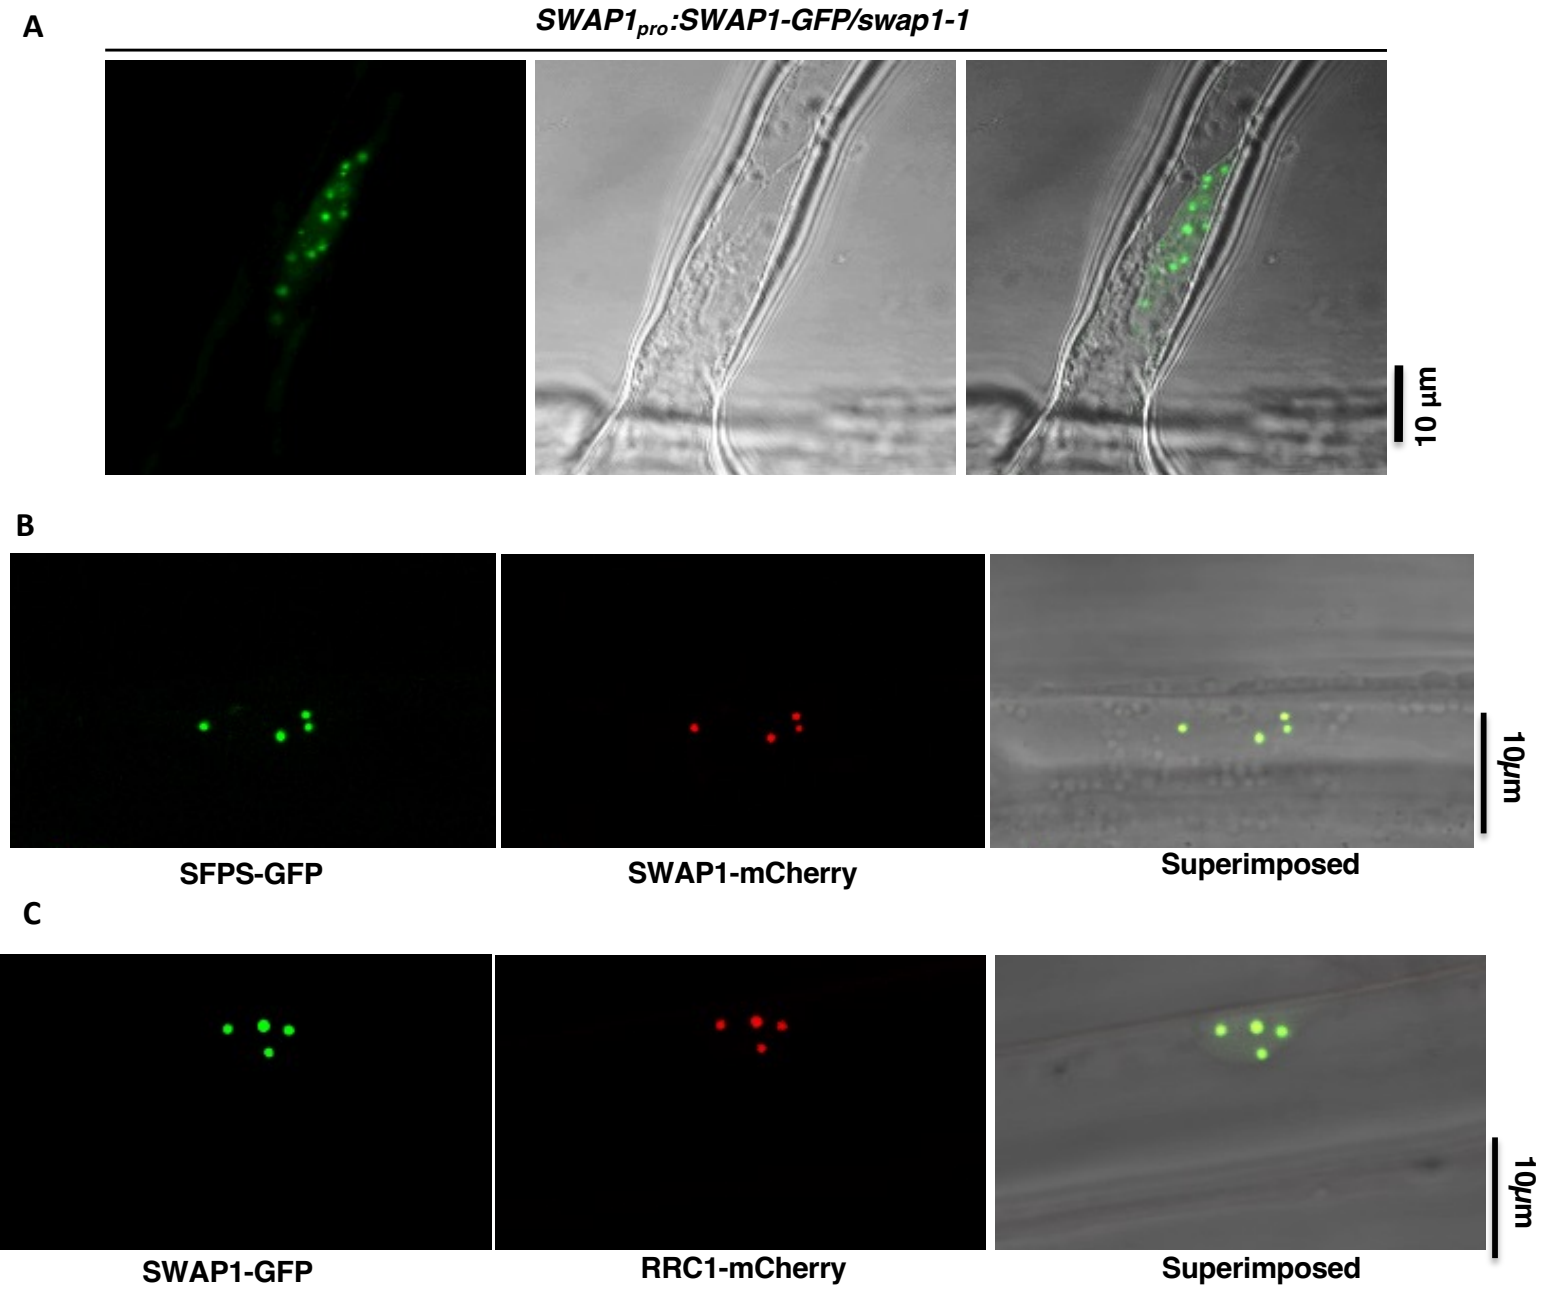

**Fig. S10: SWAP1 nuclear speckles co-localize with SFPS and RRC1**

(A) SWAP1-GFP forms nuclear speckles. (B) SFPS-GFP and SWAP1-mCherry nuclear speckles co-localize with each other. (C) SWAP1-GFP and RRC1-mCherry nuclear speckles co-localize with each other.

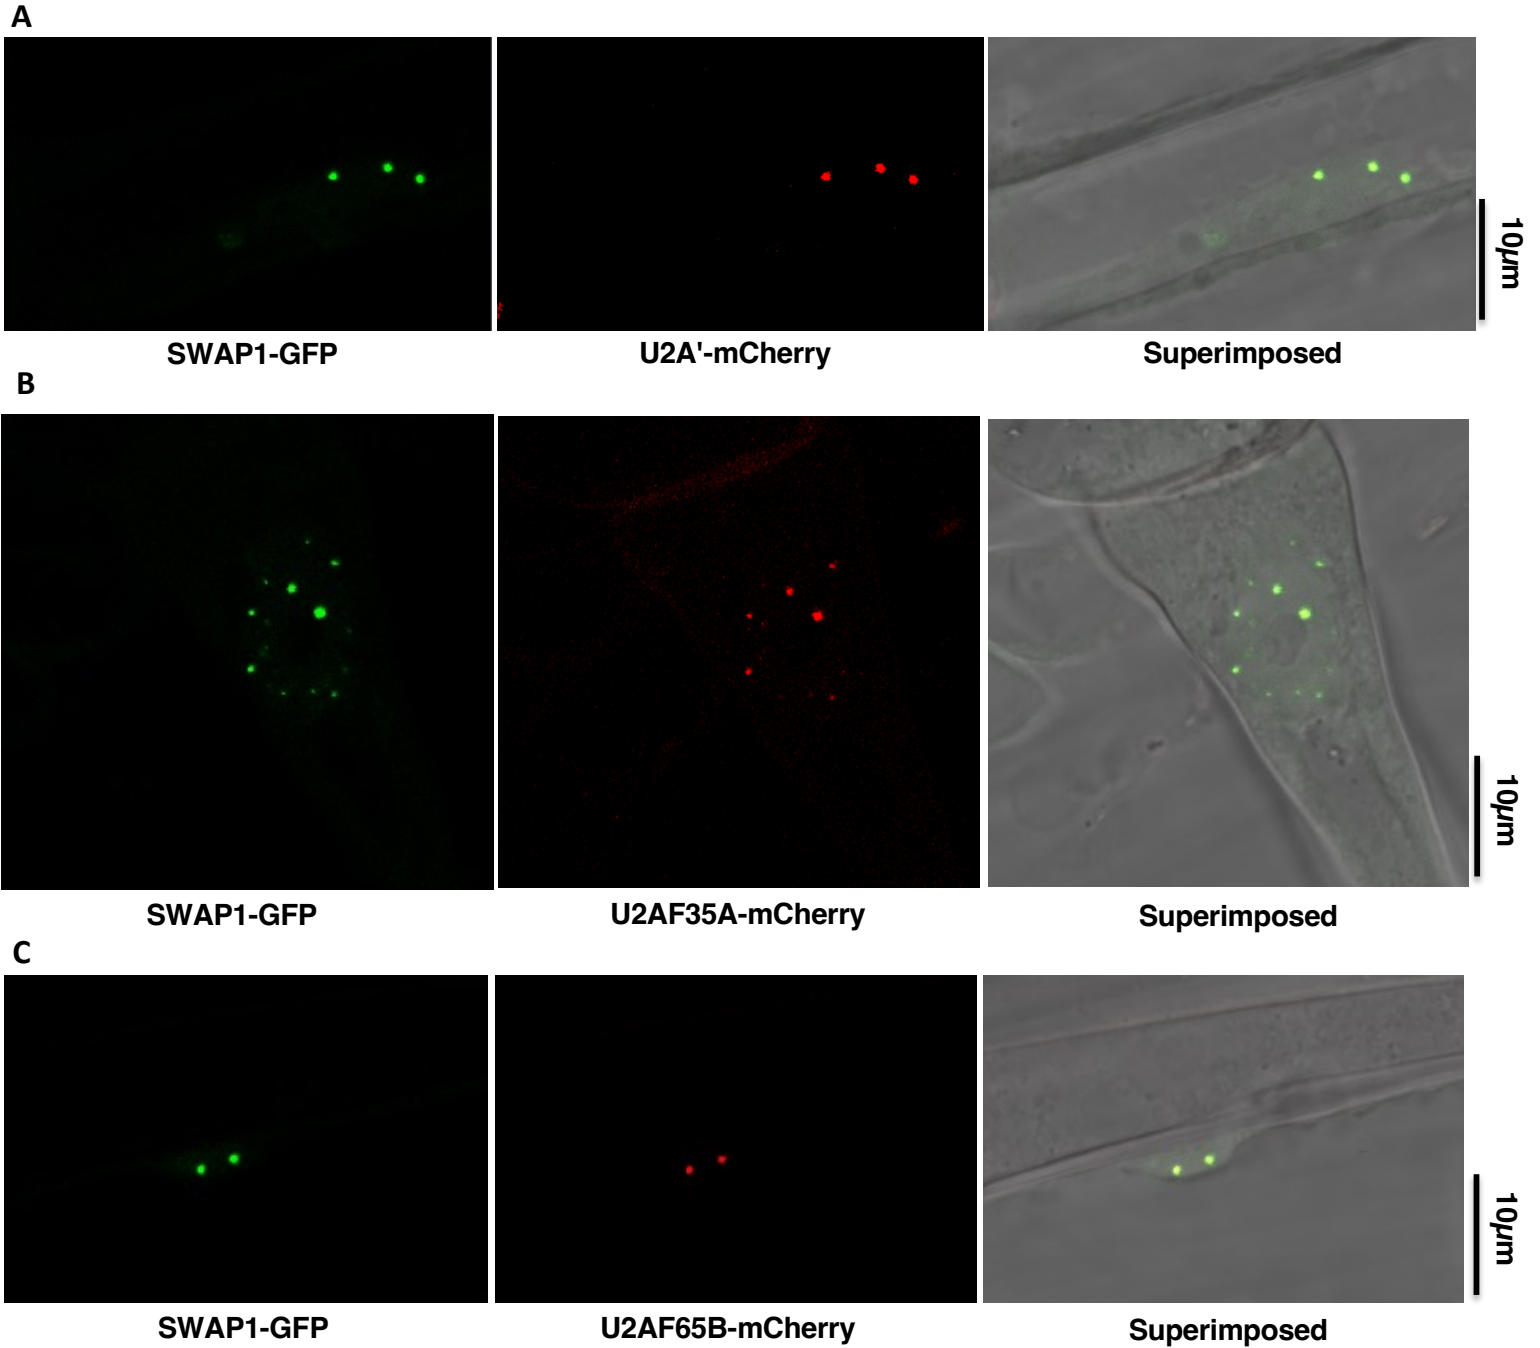

**Fig. S11: SWAP1 nuclear speckles co-localize with U2- snRNPs associated components**

(A) SWAP1-GFP nuclear speckles co-localize with nuclear speckles of U2A'-mCherry. (B) SWAP1-GFP nuclear speckles co-localize with nuclear speckles of U2AF35A-mCherry. (C) SWAP1-GFP nuclear speckles co-localize with nuclear speckles of U2AF65B-mCherry.



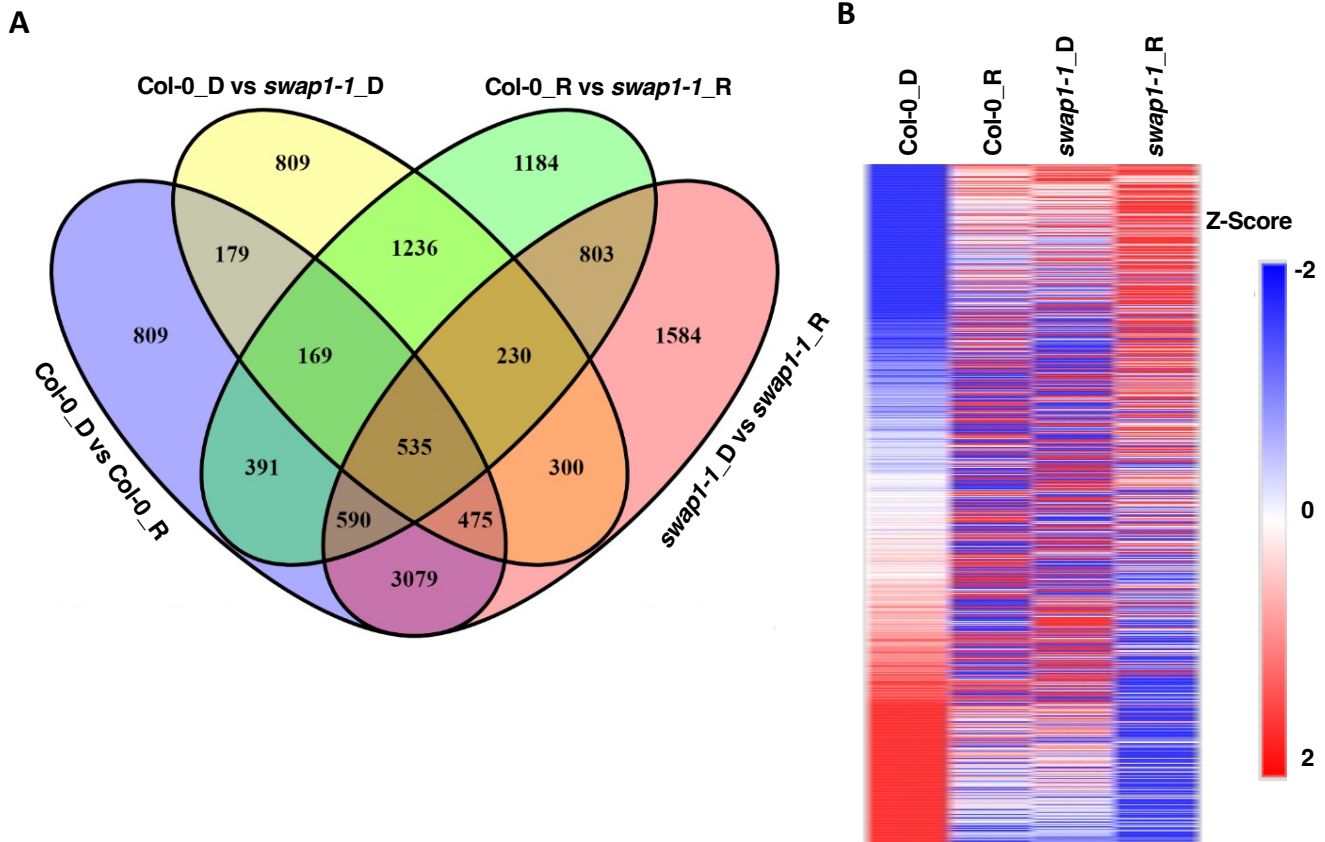

**Fig. S12: SWAP1 regulates expression of a large number of genes both in dark and light conditions**  
 (A) Venn diagram indicating both number and overlapping differentially expressed genes (DEGs) events in wild type and *swap1-1* mutant seedlings under D (Dark) and R (Red light) treated conditions.  
 (B) Heatmap of top 1000 DEGs events plotted based on their Z- scores. Z- scores are calculated based on the basis of their corresponding individual expression values under dark and red light treated conditions of wild type and *swap1-1* mutant samples.

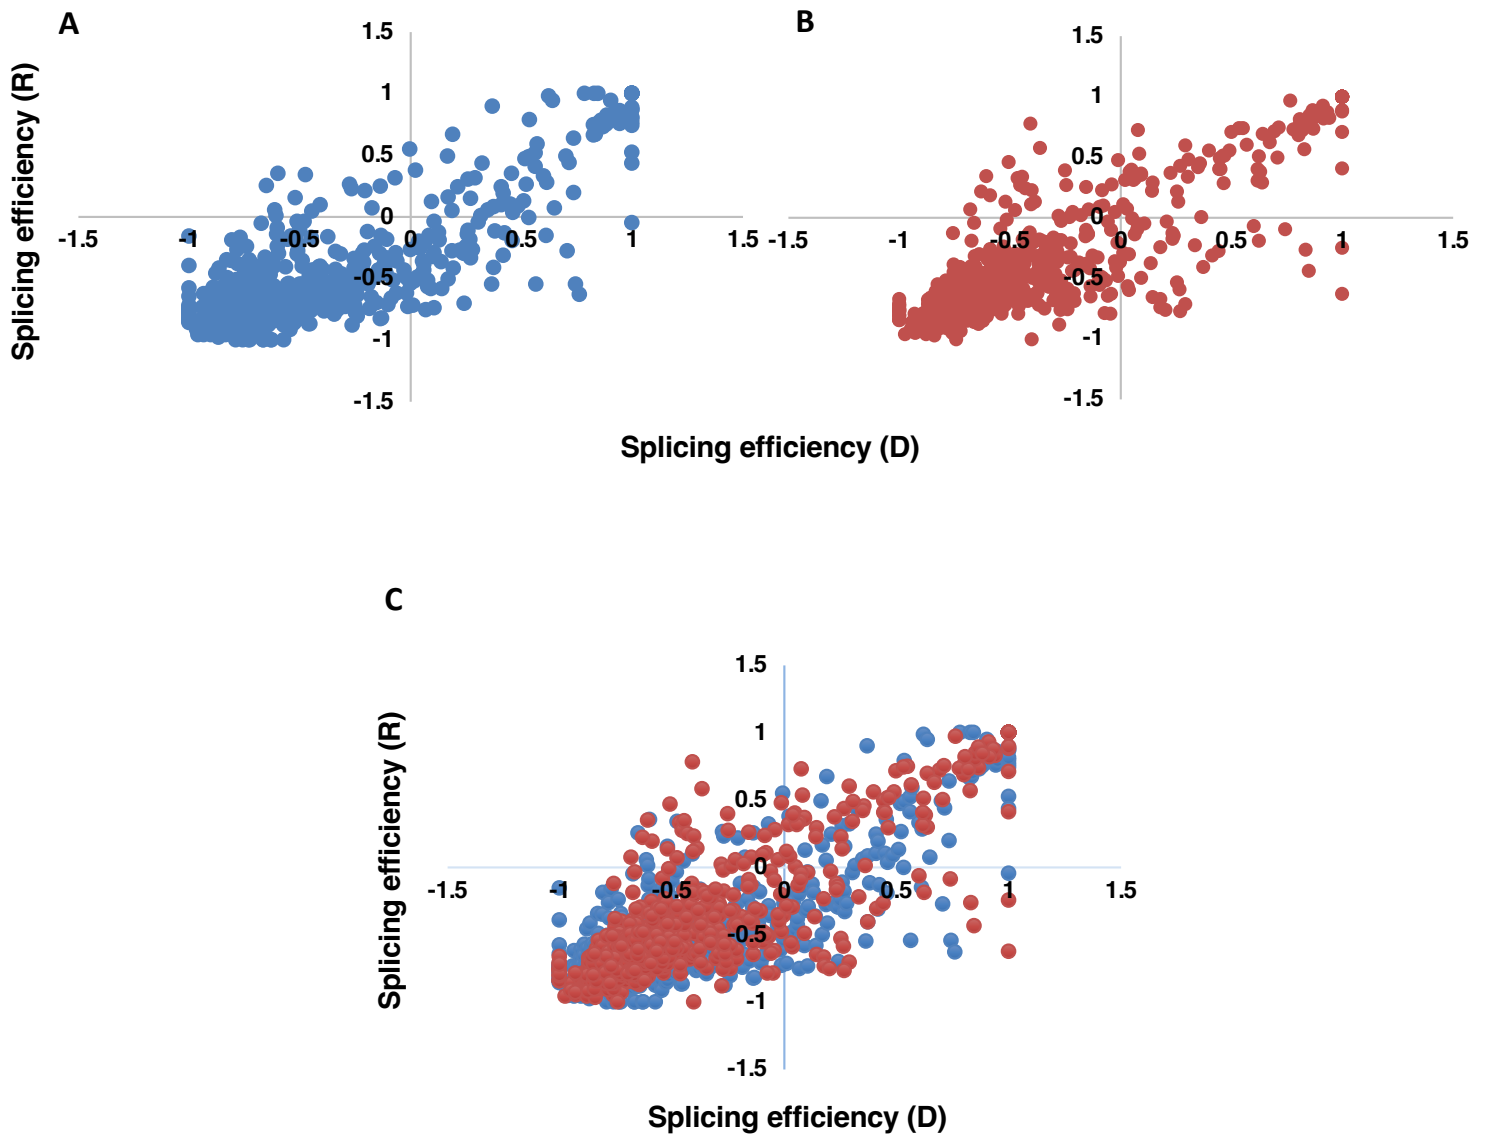

**Fig. S13: *swap1-1* exhibits altered splicing efficiency compared to wild-type**

Scatter plots exhibiting the splicing efficiency changes in wild-type (A) and *swap1-1* (B) mutant samples. (C) Overlapping of splicing efficiency observed in (A) and (B). The X-axis represents the splicing efficiency of samples in the dark, while Y-axis represents the splicing efficiency of samples under red light.

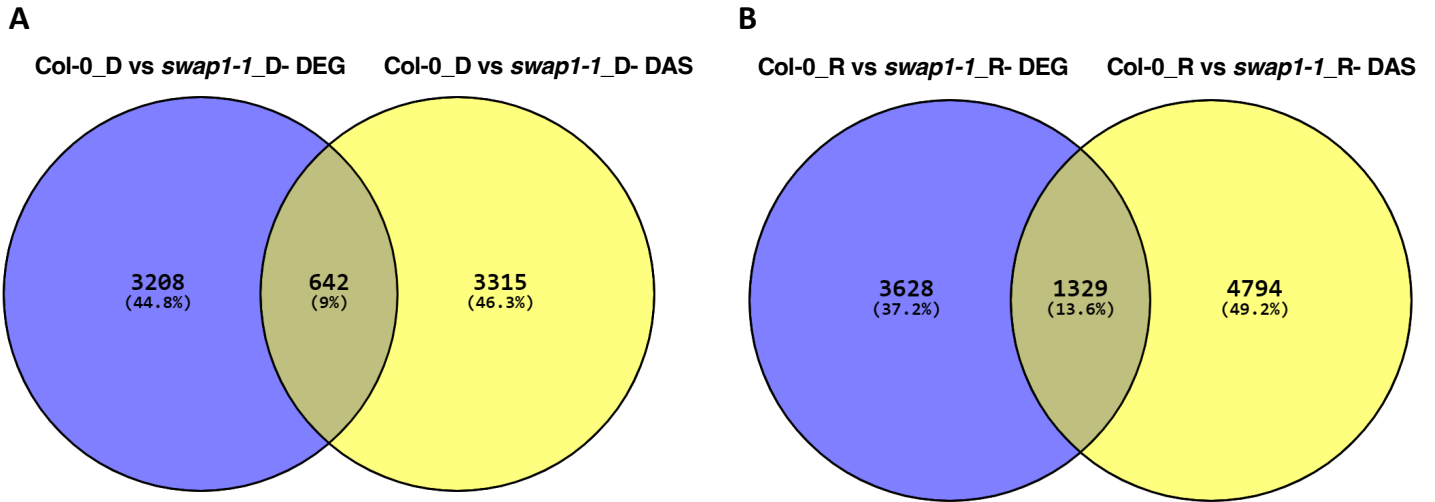

**Fig. S14: Overlap of DEGs and DAS genes modulated by SWAP1**

Venn diagram indicating both number and overlapping of DEGs and DAS genes in comparison of wild type vs *swap1-1* in the dark (A) and red light (B) illuminated conditions.

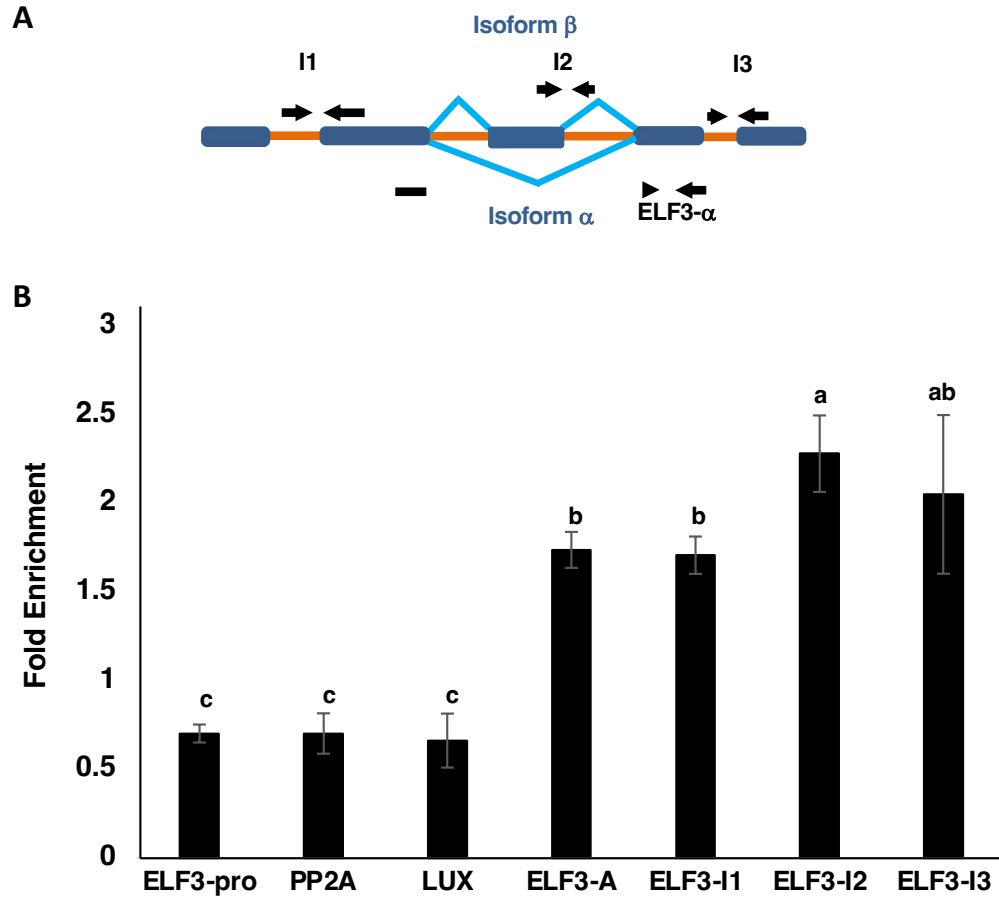

**Fig. S15: SWAP1 associates with *ELF3* pre-mRNA under *in vivo* condition**

(A) Schematic diagram showing gene structure, introns and exons, different isoforms as well as primer positions used in the RNA Immunoprecipitation-qRT-PCR assay. (B) Fold enrichment of different parts of *ELF3* pre-mRNA following immunoprecipitation of SWAP1-GFP indicates that SWAP1 associates with *ELF3* pre-mRNA under *in vivo* conditions. RNA/SWAP1-GFP complex was immunoprecipitated (IP) and extracted using anti-GFP antibodies. RNA was carefully purified from IP samples and reverse transcribed into cDNA following standard protocol. The abundance of each region in the transcript was quantified by qRT-PCR method. Each bar is the mean  $\pm$  SEM (n= 3 biological repeats). Statistical difference was calculated based on One-way ANOVA followed by Tukey's post hoc analysis. Different letters indicate statistical significance among the gene parts.

**A**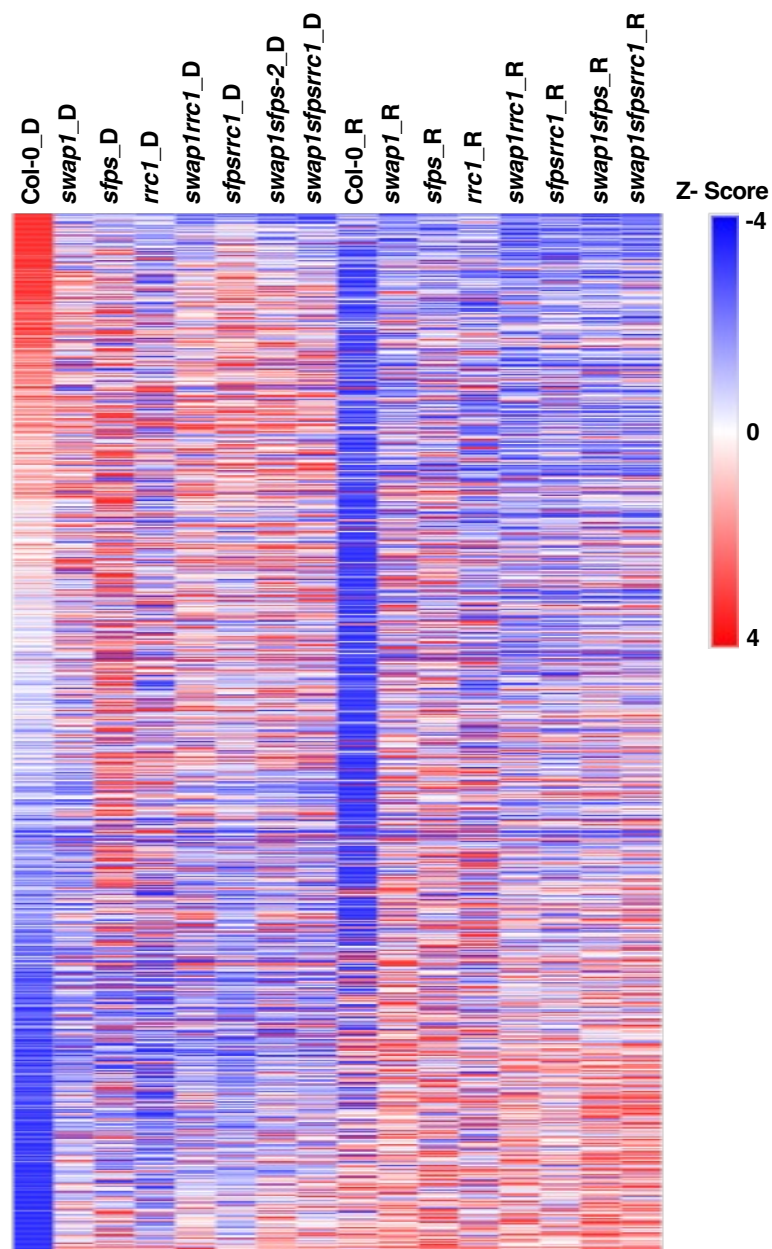**B**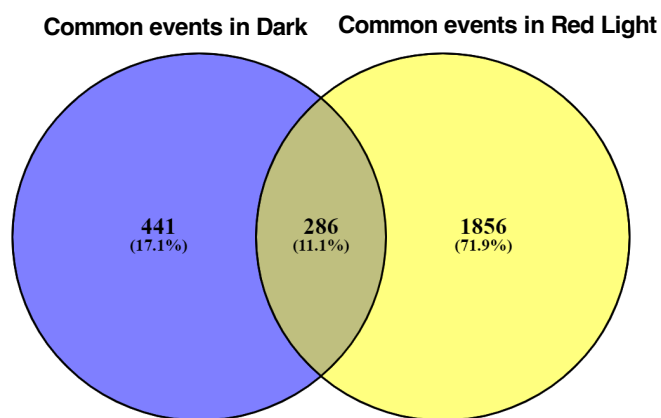

**Fig. S16: SWAP1, SFPS and RRC1 coordinately regulate pre-mRNA splicing of a subset of genes**  
 (A) Heatmap of top 1000 DAS events plotted based on their Z- scores calculated on the basis of their corresponding individual PSI/PIR values under dark and red light-treated conditions of wild type and different mutant samples.  
 (B) Venn diagram indicating both the number and overlapping DAS events regulated by all three splicing factors under dark and red light conditions.

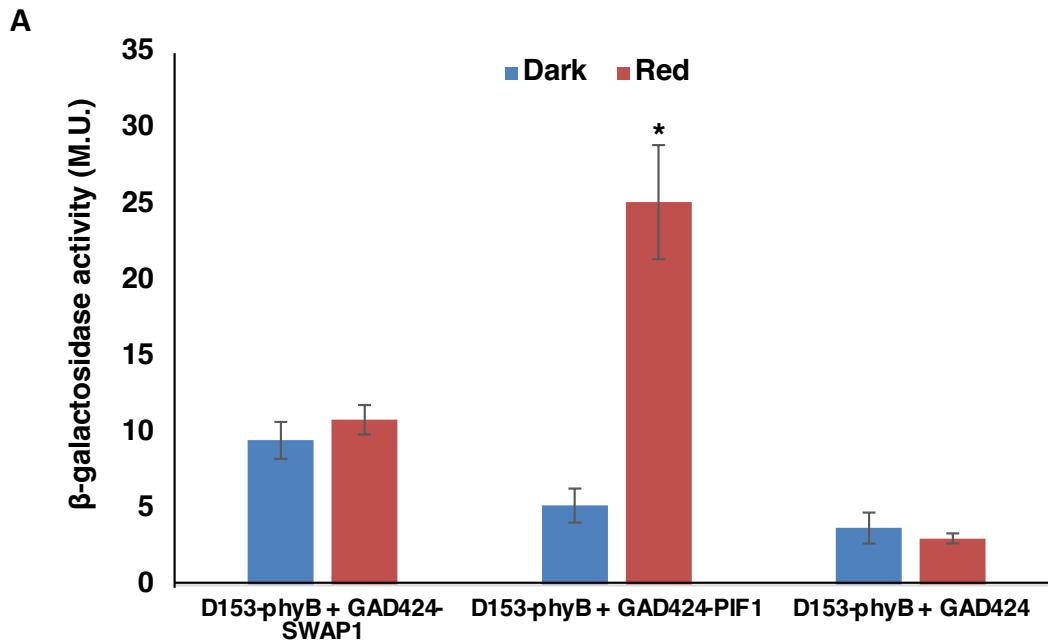

**Fig. S17: SWAP1 interacts with phyB in yeast 2-hybrid system**

Full-length *SWAP1* CDS was inserted in vector containing the GAL4 activation domain (AD), while the full-length *phyB* CDS was fused to the GAL4 DNA binding domain (BD). Liquid  $\beta$ -Galactosidase activity assay was carried out to quantify the strength of interaction between SWAP1 and phyB. Each data point reflects the average of three values and bars represent the SD. Student's T-Test was carried out to determine the statistical significance among the samples.

Table S1: Table shows the total number and types of DAS events and the corresponding gene loci numbers detected among different pairwise comparison.

| Genotype                                     | # of Events | # of Loci | IR    | ES  | Alt3SS | Alt5SS | ASCE | Novel ASP |
|----------------------------------------------|-------------|-----------|-------|-----|--------|--------|------|-----------|
| Col-0_D vs Col-0_R                           | 2007        | 1458      | 1417  | 24  | 8      | 13     | 138  | 289       |
| Col-0_D vs <i>swap1-1_D</i>                  | 7770        | 3957      | 3398  | 46  | 53     | 21     | 174  | 3327      |
| Col-0_R vs <i>swap1-1_R</i>                  | 12488       | 6123      | 7927  | 114 | 81     | 65     | 357  | 3190      |
| <i>swap1-1_D</i> vs <i>swap1-1_R</i>         | 3098        | 2089      | 2261  | 27  | 5      | 34     | 229  | 355       |
| Col-0_D vs <i>sfps-2_D</i>                   | 9728        | 5438      | 7024  | 85  | 58     | 76     | 507  | 1467      |
| Col-0_R vs <i>sfps-2_R</i>                   | 13058       | 7047      | 10309 | 123 | 71     | 107    | 447  | 1460      |
| Col-0_D vs <i>rrc1-3_D</i>                   | 13510       | 6178      | 7248  | 59  | 140    | 127    | 1245 | 3159      |
| Col-0_R vs <i>rrc1-3_R</i>                   | 21297       | 8544      | 8391  | 92  | 163    | 156    | 1237 | 8900      |
| Col-0_D vs <i>swap1sfpsrrc1_D</i>            | 11390       | 5235      | 5313  | 53  | 82     | 28     | 235  | 4618      |
| Col-0_R vs <i>swap1sfpsrrc1_R</i>            | 14869       | 6683      | 8804  | 119 | 97     | 64     | 374  | 4265      |
| <i>swap1sfps_D</i> vs <i>swap1sfpsrrc1_D</i> | 188         | 160       | 20    | 0   | 0      | 0      | 14   | 121       |
| <i>swap1sfps_R</i> vs <i>swap1sfpsrrc1_R</i> | 223         | 197       | 24    | 0   | 0      | 0      | 16   | 141       |
| <i>swap1rrc1_D</i> vs <i>swap1sfpsrrc1_D</i> | 288         | 247       | 77    | 3   | 0      | 0      | 21   | 147       |
| <i>swap1rrc1_R</i> vs <i>swap1sfpsrrc1_R</i> | 215         | 187       | 26    | 1   | 0      | 0      | 16   | 132       |
| <i>sfpsrrc1_D</i> vs <i>swap1sfpsrrc1_D</i>  | 2181        | 1506      | 511   | 10  | 7      | 2      | 47   | 1398      |
| <i>sfpsrrc1_R</i> vs <i>swap1sfpsrrc1_R</i>  | 1690        | 1242      | 490   | 7   | 7      | 3      | 62   | 939       |

Table S2: Primer sequences used in this study

| Primer             | Sequence                                     |
|--------------------|----------------------------------------------|
| SWAP1-Pro-F        | CACC GGG TGA TTT TTT GCC ACC TCC T           |
| SWAP1-Entry-F      | CACC ATG GAT CGA AGA CAG CAC GA              |
| SWAP1-R            | TCT GGT TGT AGC TCT TGC ACT CA               |
| SWAP1-NheI-F       | AGA GCT AGC ATG GAT CGA AGA CAG CAC GAT TAT  |
| SWAP1-FLAG1-R      | ATC GTC TTT GTA GTC TCT GGT TGT A            |
| SWAP1-FLAG2-R      | GTC TTT GTA GTC CTT GTC GTC ATC GTC          |
| SWAP1-FLAG3-R      | TTT GTA GTC CTT GTC GTC ATC GTC TTT GTA      |
| SWAP1-FLAG4-SmaI-R | ATA CCC GGG TCA CTT GTC GTC ATC GTC TTT GTA  |
| SWAP1-BamH1-F      | GCTGGATCCATGGATCGAAGACAGCACGA                |
| SWAP1-Xba1-R       | CCATCTAGATCTGGTTGTAGCTCTTGCACTC              |
| SWAP1-EcoR1-F      | AGA GAA TTC ATG GAT CGA AGA CAG CAC GAT TAT  |
| SWAP1-Xma1-R       | AGT CCC GGG C TCT GGT TGT AGC TCT TGC ACT CA |
| SWAP1-BamH1-R      | GCTGGATCCTCATCTGGTTGTAGCTCTTGCA              |
| SWAP1-qPCR-F       | AAGTGGACCACCTGCAAATACC                       |
| SWAP1-qPCR-R       | GTTGCAGCATTCTGGACGTTG                        |
| ELF3-Intron1 3'-F  | TTCTTGTGATTGCCCTGAGCAT                       |
| ELF3-Intron1 3'-R  | TCCATGAAGGACATTTGGGAGACAA                    |
| ELF3-Intron2-F     | CTGTCTCGGTTTGGTATTGCT                        |
| ELF3-Intron2-R     | TTTAGATCCTGGGGTCCCTCG                        |
| ELF3-Intron3-F     | CAAACCTCTTCAACTGTGTAATAATCA                  |
| ELF3a-F1           | CCATTGCCAATCAACAAAGAG                        |
| ELF3a-R1           | TGGTCAGTCTTCTCCGAGTCAC                       |
| PP2A-Pro-F         | TTA GCT GCT GCG AAA GAC GAG                  |
| PP2A-Pro-R         | TTCCAAGTTCCGAGCGATCTATC                      |
| ELF3-Pro-F         | AGC GAG TAT AAC CGT ATG ACC A                |
| ELF3-Pro-R         | GAGTGGTCGGATAGTGAGAAATC                      |
| BUD13-T-F          | GGCAAAGGTTTAGCTCAGAAGCG                      |
| BUD13-T-R          | TCAAGCTCCGGATCATCCCTTG                       |
| BUD13-IJ-F         | ATT CAT AAA GAG ACC AGT CTT CA               |
| BUD13-IJ-R         | GAA TCC ATA TTT TTA AAC CTG TAG              |
| RS31-T-F           | AGGTCCAGCAGCTTATGAAAGACG                     |
| RS31-T-R           | CTCTGGGACTGGAGAACGACTTC                      |
| RS31-IJ-F          | CTT CCT GCA AAA TCA TTT CTA CA               |
| RS31-IJ-R          | CGA TGA TTG GTA ATA GAC AGA C                |
| BIM3-T-F           | ATCTGTGCAGTTAAGCCTTCGG                       |
| BIM3-T-R           | ACCATTATCCTCAGAAGCAAACGC                     |
| BIM3-IJ-F          | TGG ATA CTA AGA GAG AAT GAT AT               |
| BIM3-IJ-R          | CAT TTA TCT CAT ACT CTA TCC TA               |
| COP1-T-F           | GTT GTA AAT GAA CCA GCA GAT AT               |
| COP1-T-R           | TTC ATG CTT ATT CCA ACT CAA GC               |
| COP1-IJ-F          | CAA TTA TTA CTA TGG GAT TCG TT               |



|           |                                |
|-----------|--------------------------------|
| COP1-IJ-R | TCT CCT CAA GTG GCC TGC T      |
| ELF3-T-F  | CAA GTT TAT CTA AGT GTG GTT TA |
| ELF3-T-R  | AGA AAC TTT CAT CGA ACT TCA GA |
| ELF3-IJ-F | GAG GGA CAT TCT CTG TTG ACC    |
| ELF3-IJ-R | AAG CAA TAC CAA ACC GAG ACA G  |

## SI References

1. S. J. Clough, A. F. Bent, Floral dip: a simplified method for *Agrobacterium*-mediated transformation of *Arabidopsis thaliana*. *Plant J* **16**, 735-743 (1998).
2. R. Xin, P. K. Kathare, E. Huq, Coordinated Regulation of Pre-mRNA Splicing by the SFPS-RRC1 Complex to Promote Photomorphogenesis. *The Plant Cell* **31**, 2052-2069 (2019).
3. A. Dobin *et al.*, STAR: ultrafast universal RNA-seq aligner. *Bioinformatics* **29**, 15-21 (2013).
4. M. I. Love, W. Huber, S. Anders, Moderated estimation of fold change and dispersion for RNA-seq data with DESeq2. *Genome Biology* **15**, 550 (2014).
5. E. Mancini, A. Rabinovich, J. Iserte, M. Yanovsky, A. Chernomoretz, ASpli: integrative analysis of splicing landscapes through RNA-Seq assays. *Bioinformatics* **37**, 2609-2616 (2021).
6. R. Xin *et al.*, SPF45-related splicing factor for phytochrome signaling promotes photomorphogenesis by regulating pre-mRNA splicing in *Arabidopsis*. *Proceedings of the National Academy of Sciences* **114**, E7018-E7027 (2017).
